# Supplementary material
Source: publisher figshare collection journal article supplement (https://acs.figshare.com/ndownloader/files/4695610)
Supplement: Supplementary file 1 [file 4695610]

@relation temp

@attribute 2DACorr\_Ident\_1 numeric  
@attribute 2DACorr\_Ident\_10 numeric  
@attribute 2DACorr\_Ident\_11 numeric  
@attribute 2DACorr\_Ident\_2 numeric  
@attribute 2DACorr\_Ident\_3 numeric  
@attribute 2DACorr\_Ident\_4 numeric  
@attribute 2DACorr\_Ident\_5 numeric  
@attribute 2DACorr\_Ident\_6 numeric  
@attribute 2DACorr\_Ident\_7 numeric  
@attribute 2DACorr\_Ident\_8 numeric  
@attribute 2DACorr\_Ident\_9 numeric  
@attribute 2DACorr\_LpEN\_1 numeric  
@attribute 2DACorr\_LpEN\_10 numeric  
@attribute 2DACorr\_LpEN\_11 numeric  
@attribute 2DACorr\_LpEN\_2 numeric  
@attribute 2DACorr\_LpEN\_3 numeric  
@attribute 2DACorr\_LpEN\_4 numeric  
@attribute 2DACorr\_LpEN\_5 numeric  
@attribute 2DACorr\_LpEN\_6 numeric  
@attribute 2DACorr\_LpEN\_7 numeric  
@attribute 2DACorr\_LpEN\_8 numeric  
@attribute 2DACorr\_LpEN\_9 numeric  
@attribute 2DACorr\_PiChg\_1 numeric  
@attribute 2DACorr\_PiChg\_10 numeric  
@attribute 2DACorr\_PiChg\_11 numeric  
@attribute 2DACorr\_PiChg\_2 numeric  
@attribute 2DACorr\_PiChg\_3 numeric  
@attribute 2DACorr\_PiChg\_4 numeric  
@attribute 2DACorr\_PiChg\_5 numeric  
@attribute 2DACorr\_PiChg\_6 numeric  
@attribute 2DACorr\_PiChg\_7 numeric  
@attribute 2DACorr\_PiChg\_8 numeric  
@attribute 2DACorr\_PiChg\_9 numeric  
@attribute 2DACorr\_PiEN\_1 numeric  
@attribute 2DACorr\_PiEN\_10 numeric  
@attribute 2DACorr\_PiEN\_11 numeric  
@attribute 2DACorr\_PiEN\_2 numeric  
@attribute 2DACorr\_PiEN\_3 numeric  
@attribute 2DACorr\_PiEN\_4 numeric  
@attribute 2DACorr\_PiEN\_5 numeric  
@attribute 2DACorr\_PiEN\_6 numeric  
@attribute 2DACorr\_PiEN\_7 numeric  
@attribute 2DACorr\_PiEN\_8 numeric  
@attribute 2DACorr\_PiEN\_9 numeric  
@attribute 2DACorr\_Polariz\_1 numeric  
@attribute 2DACorr\_Polariz\_10 numeric  
@attribute 2DACorr\_Polariz\_11 numeric  
@attribute 2DACorr\_Polariz\_2 numeric  
@attribute 2DACorr\_Polariz\_3 numeric  
@attribute 2DACorr\_Polariz\_4 numeric  
@attribute 2DACorr\_Polariz\_5 numeric  
@attribute 2DACorr\_Polariz\_6 numeric  
@attribute 2DACorr\_Polariz\_7 numeric  
@attribute 2DACorr\_Polariz\_8 numeric  
@attribute 2DACorr\_Polariz\_9 numeric

@attribute 2DACorr\_SigChg\_1 numeric  
@attribute 2DACorr\_SigChg\_10 numeric  
@attribute 2DACorr\_SigChg\_11 numeric  
@attribute 2DACorr\_SigChg\_2 numeric  
@attribute 2DACorr\_SigChg\_3 numeric  
@attribute 2DACorr\_SigChg\_4 numeric  
@attribute 2DACorr\_SigChg\_5 numeric  
@attribute 2DACorr\_SigChg\_6 numeric  
@attribute 2DACorr\_SigChg\_7 numeric  
@attribute 2DACorr\_SigChg\_8 numeric  
@attribute 2DACorr\_SigChg\_9 numeric  
@attribute 2DACorr\_SigEN\_1 numeric  
@attribute 2DACorr\_SigEN\_10 numeric  
@attribute 2DACorr\_SigEN\_11 numeric  
@attribute 2DACorr\_SigEN\_2 numeric  
@attribute 2DACorr\_SigEN\_3 numeric  
@attribute 2DACorr\_SigEN\_4 numeric  
@attribute 2DACorr\_SigEN\_5 numeric  
@attribute 2DACorr\_SigEN\_6 numeric  
@attribute 2DACorr\_SigEN\_7 numeric  
@attribute 2DACorr\_SigEN\_8 numeric  
@attribute 2DACorr\_SigEN\_9 numeric  
@attribute 2DACorr\_TotChg\_1 numeric  
@attribute 2DACorr\_TotChg\_10 numeric  
@attribute 2DACorr\_TotChg\_11 numeric  
@attribute 2DACorr\_TotChg\_2 numeric  
@attribute 2DACorr\_TotChg\_3 numeric  
@attribute 2DACorr\_TotChg\_4 numeric  
@attribute 2DACorr\_TotChg\_5 numeric  
@attribute 2DACorr\_TotChg\_6 numeric  
@attribute 2DACorr\_TotChg\_7 numeric  
@attribute 2DACorr\_TotChg\_8 numeric  
@attribute 2DACorr\_TotChg\_9 numeric  
@attribute 3DACorr\_Ident\_1 numeric  
@attribute 3DACorr\_Ident\_10 numeric  
@attribute 3DACorr\_Ident\_100 numeric  
@attribute 3DACorr\_Ident\_101 numeric  
@attribute 3DACorr\_Ident\_102 numeric  
@attribute 3DACorr\_Ident\_103 numeric  
@attribute 3DACorr\_Ident\_104 numeric  
@attribute 3DACorr\_Ident\_105 numeric  
@attribute 3DACorr\_Ident\_106 numeric  
@attribute 3DACorr\_Ident\_107 numeric  
@attribute 3DACorr\_Ident\_108 numeric  
@attribute 3DACorr\_Ident\_109 numeric  
@attribute 3DACorr\_Ident\_11 numeric  
@attribute 3DACorr\_Ident\_110 numeric  
@attribute 3DACorr\_Ident\_111 numeric  
@attribute 3DACorr\_Ident\_112 numeric  
@attribute 3DACorr\_Ident\_113 numeric  
@attribute 3DACorr\_Ident\_114 numeric  
@attribute 3DACorr\_Ident\_115 numeric  
@attribute 3DACorr\_Ident\_116 numeric  
@attribute 3DACorr\_Ident\_117 numeric  
@attribute 3DACorr\_Ident\_118 numeric  
@attribute 3DACorr\_Ident\_119 numeric  
@attribute 3DACorr\_Ident\_12 numeric

@attribute 3DACorr\_Ident\_120 numeric  
@attribute 3DACorr\_Ident\_121 numeric  
@attribute 3DACorr\_Ident\_122 numeric  
@attribute 3DACorr\_Ident\_123 numeric  
@attribute 3DACorr\_Ident\_124 numeric  
@attribute 3DACorr\_Ident\_125 numeric  
@attribute 3DACorr\_Ident\_126 numeric  
@attribute 3DACorr\_Ident\_127 numeric  
@attribute 3DACorr\_Ident\_128 numeric  
@attribute 3DACorr\_Ident\_13 numeric  
@attribute 3DACorr\_Ident\_14 numeric  
@attribute 3DACorr\_Ident\_15 numeric  
@attribute 3DACorr\_Ident\_16 numeric  
@attribute 3DACorr\_Ident\_17 numeric  
@attribute 3DACorr\_Ident\_18 numeric  
@attribute 3DACorr\_Ident\_19 numeric  
@attribute 3DACorr\_Ident\_2 numeric  
@attribute 3DACorr\_Ident\_20 numeric  
@attribute 3DACorr\_Ident\_21 numeric  
@attribute 3DACorr\_Ident\_22 numeric  
@attribute 3DACorr\_Ident\_23 numeric  
@attribute 3DACorr\_Ident\_24 numeric  
@attribute 3DACorr\_Ident\_25 numeric  
@attribute 3DACorr\_Ident\_26 numeric  
@attribute 3DACorr\_Ident\_27 numeric  
@attribute 3DACorr\_Ident\_28 numeric  
@attribute 3DACorr\_Ident\_29 numeric  
@attribute 3DACorr\_Ident\_3 numeric  
@attribute 3DACorr\_Ident\_30 numeric  
@attribute 3DACorr\_Ident\_31 numeric  
@attribute 3DACorr\_Ident\_32 numeric  
@attribute 3DACorr\_Ident\_33 numeric  
@attribute 3DACorr\_Ident\_34 numeric  
@attribute 3DACorr\_Ident\_35 numeric  
@attribute 3DACorr\_Ident\_36 numeric  
@attribute 3DACorr\_Ident\_37 numeric  
@attribute 3DACorr\_Ident\_38 numeric  
@attribute 3DACorr\_Ident\_39 numeric  
@attribute 3DACorr\_Ident\_4 numeric  
@attribute 3DACorr\_Ident\_40 numeric  
@attribute 3DACorr\_Ident\_41 numeric  
@attribute 3DACorr\_Ident\_42 numeric  
@attribute 3DACorr\_Ident\_43 numeric  
@attribute 3DACorr\_Ident\_44 numeric  
@attribute 3DACorr\_Ident\_45 numeric  
@attribute 3DACorr\_Ident\_46 numeric  
@attribute 3DACorr\_Ident\_47 numeric  
@attribute 3DACorr\_Ident\_48 numeric  
@attribute 3DACorr\_Ident\_49 numeric  
@attribute 3DACorr\_Ident\_5 numeric  
@attribute 3DACorr\_Ident\_50 numeric  
@attribute 3DACorr\_Ident\_51 numeric  
@attribute 3DACorr\_Ident\_52 numeric  
@attribute 3DACorr\_Ident\_53 numeric  
@attribute 3DACorr\_Ident\_54 numeric  
@attribute 3DACorr\_Ident\_55 numeric  
@attribute 3DACorr\_Ident\_56 numeric

@attribute 3DACorr\_Ident\_57 numeric  
@attribute 3DACorr\_Ident\_58 numeric  
@attribute 3DACorr\_Ident\_59 numeric  
@attribute 3DACorr\_Ident\_6 numeric  
@attribute 3DACorr\_Ident\_60 numeric  
@attribute 3DACorr\_Ident\_61 numeric  
@attribute 3DACorr\_Ident\_62 numeric  
@attribute 3DACorr\_Ident\_63 numeric  
@attribute 3DACorr\_Ident\_64 numeric  
@attribute 3DACorr\_Ident\_65 numeric  
@attribute 3DACorr\_Ident\_66 numeric  
@attribute 3DACorr\_Ident\_67 numeric  
@attribute 3DACorr\_Ident\_68 numeric  
@attribute 3DACorr\_Ident\_69 numeric  
@attribute 3DACorr\_Ident\_7 numeric  
@attribute 3DACorr\_Ident\_70 numeric  
@attribute 3DACorr\_Ident\_71 numeric  
@attribute 3DACorr\_Ident\_72 numeric  
@attribute 3DACorr\_Ident\_73 numeric  
@attribute 3DACorr\_Ident\_74 numeric  
@attribute 3DACorr\_Ident\_75 numeric  
@attribute 3DACorr\_Ident\_76 numeric  
@attribute 3DACorr\_Ident\_77 numeric  
@attribute 3DACorr\_Ident\_78 numeric  
@attribute 3DACorr\_Ident\_79 numeric  
@attribute 3DACorr\_Ident\_8 numeric  
@attribute 3DACorr\_Ident\_80 numeric  
@attribute 3DACorr\_Ident\_81 numeric  
@attribute 3DACorr\_Ident\_82 numeric  
@attribute 3DACorr\_Ident\_83 numeric  
@attribute 3DACorr\_Ident\_84 numeric  
@attribute 3DACorr\_Ident\_85 numeric  
@attribute 3DACorr\_Ident\_86 numeric  
@attribute 3DACorr\_Ident\_87 numeric  
@attribute 3DACorr\_Ident\_88 numeric  
@attribute 3DACorr\_Ident\_89 numeric  
@attribute 3DACorr\_Ident\_9 numeric  
@attribute 3DACorr\_Ident\_90 numeric  
@attribute 3DACorr\_Ident\_91 numeric  
@attribute 3DACorr\_Ident\_92 numeric  
@attribute 3DACorr\_Ident\_93 numeric  
@attribute 3DACorr\_Ident\_94 numeric  
@attribute 3DACorr\_Ident\_95 numeric  
@attribute 3DACorr\_Ident\_96 numeric  
@attribute 3DACorr\_Ident\_97 numeric  
@attribute 3DACorr\_Ident\_98 numeric  
@attribute 3DACorr\_Ident\_99 numeric  
@attribute ASA numeric  
@attribute ASPH numeric  
@attribute Aliphatic\_atom\_count numeric  
@attribute Aliphatic\_bond\_count numeric  
@attribute Aliphatic\_ring\_count numeric  
@attribute Aromatic\_atom\_count numeric  
@attribute Aromatic\_bond\_count numeric  
@attribute Aromatic\_ring\_count numeric  
@attribute Asymmetric\_atom\_count numeric  
@attribute Atom\_count numeric

@attribute Balaban\_index numeric  
@attribute Bond\_count numeric  
@attribute Carbo\_ring\_count numeric  
@attribute Carboaromatic\_ring\_count numeric  
@attribute Chain\_atom\_count numeric  
@attribute Chain\_bond\_count numeric  
@attribute Chi0 numeric  
@attribute Chi1 numeric  
@attribute Cyclomatic\_number numeric  
@attribute Diameter numeric  
@attribute Dipole numeric  
@attribute ECC numeric  
@attribute E\_ACID\_COUNT numeric  
@attribute E\_ALIPHATIC\_AMINE\_COUNT numeric  
@attribute E\_AROMATIC\_AMINE\_COUNT numeric  
@attribute E\_BASIC\_NITROGEN\_COUNT numeric  
@attribute E\_GUANIDINE\_COUNT numeric  
@attribute E\_PRIMARY\_ALIPHATIC\_AMINE\_COUNT numeric  
@attribute E\_PRIMARY\_SECONDARY\_ALIPHATIC\_AMINE\_COUNT numeric  
@attribute E\_SECONDARY\_ALIPHATIC\_AMINE\_COUNT numeric  
@attribute E\_SULFONAMIDE\_CO\_COUNT numeric  
@attribute E\_TERTIARY\_ALIPHATIC\_AMINE\_COUNT numeric  
@attribute E\_TPSA numeric  
@attribute Fused\_aliphatic\_ring\_count numeric  
@attribute HAcc numeric  
@attribute HDon numeric  
@attribute Harary\_index numeric  
@attribute Hetero\_ring\_count numeric  
@attribute Heteroaromatic\_ring\_count numeric  
@attribute Hyper\_wiener\_index numeric  
@attribute IXX numeric  
@attribute IYY numeric  
@attribute IZZ numeric  
@attribute Kappa1 numeric  
@attribute Kappa2 numeric  
@attribute Kappa3 numeric  
@attribute Largest\_ring\_size numeric  
@attribute Maxdist2 numeric  
@attribute Maxdist3 numeric  
@attribute PSA numeric  
@attribute Polariz numeric  
@attribute RGYR numeric  
@attribute Radius numeric  
@attribute Randic numeric  
@attribute Randic\_index numeric  
@attribute Refractivity numeric  
@attribute Ring\_atom\_count numeric  
@attribute Ring\_bond\_count numeric  
@attribute Rotatable\_bond\_count numeric  
@attribute SPAN numeric  
@attribute Shape numeric  
@attribute Smallest\_ring\_size numeric  
@attribute Szeged\_index numeric  
@attribute TPSA numeric  
@attribute Weight numeric  
@attribute Wiener numeric  
@attribute Wiener\_index numeric

@attribute Wiener\_polarity numeric  
@attribute acceptorcount numeric  
@attribute accsitecount numeric  
@attribute apKa1 numeric  
@attribute bpKa1 numeric  
@attribute count numeric  
@attribute donorcount numeric  
@attribute donsitedcount numeric  
@attribute logP numeric  
@attribute molecular numeric  
@attribute pH=1.00 numeric  
@attribute pH=10.00 numeric  
@attribute pH=2.00 numeric  
@attribute pH=3.00 numeric  
@attribute pH=4.00 numeric  
@attribute pH=5.00 numeric  
@attribute pH=6.00 numeric  
@attribute pH=7.00 numeric  
@attribute pH=8.00 numeric  
@attribute pH=9.00 numeric  
@attribute ISOFORM {CYP3A,CYP2D6,CYP2C9}

@data

50,116,100,52,91,117,120,124,138,137,122,102.095,38.7469,28.8217,0,16.8941,21.97  
33,29.5401,12.8895,5.50551,60.6976,0,0.310403,-0.00223,0.000201,-0.024157,-  
0.14686,0.051369,-  
0.048155,0.006183,0.001266,0.004446,0.002735,645.863,170.301,35.9563,645.029,881  
.142,846.539,812.293,889.726,811.183,617.755,299.979,2925.27,4850.4,3407.85,3718  
.32,5965.94,7055.28,7265.11,7164.12,7201.32,6840.95,5852.66,0.470666,0.026971,0.  
033642,-0.257506,0.052436,-0.033038,-0.009426,0.059611,-0.095296,0.148034,-  
0.159096,3582.22,7822.99,6306.23,3821.85,6562.52,8470.64,8853.93,9022.64,9748.49  
,9592,8523.48,0.731512,0.015659,0.019763,-0.306771,0.057707,0.081028,-  
0.394517,0.158272,0.072338,0.078159,-  
0.149612,23,0,0,1,0,1,0,2,0,0,0,0,5,0,1,0,0,0,0,0,0,0,41,0,0,0,0,0,0,0,0,0,2,1  
0,41,11,10,26,11,0,4,22,4,6,26,5,9,22,14,16,1,15,16,15,17,18,12,20,17,13,14,15,1  
8,12,24,19,17,12,16,10,19,13,5,29,10,20,13,22,23,13,16,16,22,6,9,12,17,15,12,18,  
19,22,14,10,0,14,16,11,11,9,8,14,16,14,8,13,10,7,6,7,7,9,11,4,8,5,0,3,3,3,3,4,4,  
2,4,1,1,510.911,0.048844,12,13,0,15,16,3,0,50,1.65,52,1,1,12,13,19.3885,13.0284,  
3,12.0426,6.58481,0.776252,0,0,1,0,0,0,0,0,0,0,0,37.61,0,4,0,102.91,2,2,6795,3024.  
58,4797.69,6739.41,21.7027,10.1563,8.4898,6,7.52306,5.45911,37.61,44.753,4.24347  
,6.8193,13.0284,22.08,111.66,15,16,7,6.49046,0.765957,5,2433,37.61,404.332,1809,  
1809,42,5,6,20,3.66,2,0,0,4.81,44.03,2.69,4.81,3.13,3.85,4.53,4.77,4.8,4.8,4.81,  
4.81,CYP3A  
44,44,32,47,85,116,132,133,126,132,93,5.57284,0,0,0,0,0,0,0,2.78552,0,0,0.021375  
,0,0,-0.01107,0.006713,-0.008652,0.002293,0.000102,-  
0.000087,0.000013,0,483.419,0,0,507.083,645.973,659.423,521.152,463.114,279.071,  
134.048,18.4213,2783.07,1361.64,715.356,3644.59,6113.51,8098.49,8400.1,7971.62,6  
984.96,5693.37,3249.57,0.226847,-0.02045,0.029607,-0.031723,-  
0.107278,0.006117,0.046828,-0.041575,0.004748,0.038397,-  
0.051479,2784.15,2616.7,1814.82,3116.19,5546.59,7505.76,8445.1,8503.25,7988.7,80  
25.56,5565.77,0.310051,-0.012303,0.029331,-0.075527,-0.084722,-  
0.010956,0.044221,-0.055373,0.028819,0.030725,-  
0.062624,22,1,0,0,0,0,0,0,0,0,0,0,1,0,0,0,0,0,0,0,0,0,40,0,0,0,0,0,0,0,0,0,1  
8,30,20,7,20,9,0,7,7,10,9,24,13,5,12,17,17,0,12,23,10,15,16,18,12,19,33,13,12,21  
,9,12,12,13,16,14,14,19,13,7,10,15,13,19,14,8,16,13,20,7,6,11,12,13,8,4,13,7,12,  
8,3,0,8,9,5,9,11,6,4,3,1,4,9,0,3,5,7,4,1,0,0,0,1,0,0,1,1,0,0,0,0,0,0,0,386.21,0.  
036624,10,13,2,12,12,2,0,44,1.59,47,2,1,1,2,14.9409,10.8265,4,10.1357,2.4774,0.5

82387,0,1,0,1,0,0,0,0,0,1,16.13,0,2,0,81.17,2,1,2773,1502.77,1848.63,2817.67,15.  
5232,6.85714,4.75,7,7.76831,2.9257,16.13,36.599,3.25908,6.05632,10.8265,19.46,10  
1.53,21,23,0,5.85749,0.673581,6,1679,16.13,290.402,928,928,40,2,2,20,9.54,3,0,0,  
3.3,35.41,-2.21,3.17,-2.16,-1.86,-1.16,-0.58,-0.07,0.78,1.75,2.65,CYP3A  
65,144,102,69,136,207,266,303,276,221,185,83.0949,0,28.1778,0,14.1471,31.1006,28  
.8282,24.7625,26.4738,23.1029,0,0.034029,0.005306,-0.011477,-0.013917,0.013032,-  
0.01613,0,0,0,0.007295,-  
0.009439,419.853,224.697,210.629,241.848,292.564,261.025,87.1565,80.7331,62.4717  
,205.809,263.207,3678.96,5059.7,3392.19,5115.35,9692.26,13746.3,15837.6,15466,12  
536.1,9423.56,7142.07,0.970393,-0.102959,0.04168,-0.448308,-  
0.164754,0.107084,0.148826,-0.089649,-0.216648,0.361528,-  
0.161491,4386.71,9468.6,6760.12,4747.54,9143.73,13796.5,17544,19895.8,17966.4,14  
457.3,12155.4,1.14063,-0.154427,0.066728,-0.518188,-0.171317,0.111142,0.127656,-  
0.073482,-0.198976,0.357755,-  
0.173909,32,1,6,0,4,6,2,4,2,2,5,1,14,3,2,0,1,0,1,2,0,1,1,48,0,0,0,0,0,0,0,0,1,13  
,17,62,29,26,42,31,0,20,27,14,18,27,28,24,20,30,36,2,30,31,40,27,46,35,34,29,39,  
39,2,29,40,24,32,19,26,23,21,25,23,9,32,27,31,31,24,20,25,29,22,25,24,24,18,24,2  
2,20,15,19,13,13,18,1,18,20,22,12,17,14,18,19,10,17,16,10,15,12,9,12,16,13,13,6,  
8,2,9,4,10,9,3,5,12,9,9,4,586.794,0.082603,31,35,5,0,0,0,9,65,1.29,69,4,0,11,11,  
22.1814,14.7075,5,13.7309,4.30914,0.926067,0,0,0,0,0,0,0,0,0,0,93.06,5,6,2,139.2  
9,1,0,8605,2105.72,5580.15,6663.17,22.7755,7.76547,4.8,6,8.14263,3.6853,93.06,45  
.115,4.08219,7.33283,14.7075,28.2,116.11,20,24,4,7.35966,0.872525,5,4369,93.06,4  
30.534,2307,2307,70,6,8,13.95,-  
10,9,2,2,3.4,45.45,3.4,3.4,3.4,3.4,3.4,3.4,3.4,3.4,3.4,3.4,CYP3A  
54,119,83,56,97,119,149,180,187,183,155,104.828,52.4732,0,0,12.4892,44.5917,18.8  
256,6.56649,36.1933,66.7232,52.8551,0.2362,-0.027673,0,-0.015437,-0.043122,-  
0.018042,-0.034333,-0.017114,-0.041332,0.096211,-  
0.017258,764.082,187.072,0,727.762,985.95,1226.56,998.671,953.984,1047.52,887.48  
4,514.141,3147.68,3402.52,1913.52,4074.99,6699.37,9228.41,10175.4,10285.6,9126.3  
3,7155.93,5243.93,1.05275,0.39037,-0.149237,-0.420218,-  
0.347193,0.342649,0.143103,-0.187418,-0.274634,0.21715,-  
0.179862,4041.71,8510.84,6042.14,4334.52,7310.8,9199.53,11185.2,13365.1,13698.8,  
13039.2,11054.8,1.50124,0.621724,-0.243419,-0.56576,-  
0.305133,0.367101,0.010877,-0.114784,-0.632254,0.411956,-  
0.127126,24,2,5,3,2,1,1,2,0,0,2,1,23,1,0,1,1,1,0,0,0,0,0,0,19,0,0,0,1,0,0,0,0,0,4,  
24,21,18,22,11,11,0,9,13,9,15,20,13,10,17,17,12,2,21,29,19,19,27,19,21,25,18,23,  
18,35,23,18,16,19,25,16,25,18,21,6,22,25,14,17,28,24,18,23,20,21,5,18,13,14,14,1  
9,19,19,12,17,22,0,12,12,8,14,11,15,15,16,5,8,17,5,13,12,7,6,7,7,4,4,6,0,3,7,2,5  
,4,5,9,1,5,2,532.235,0.052402,23,25,2,6,6,1,1,54,1.78,56,3,1,13,13,21.129,13.942  
6,3,13.2301,7.51073,0.855193,0,0,0,0,0,0,0,0,0,0,83.09,2,7,1,121.11,0,0,6728,220  
0.92,4246.35,5223.61,23.6587,10.5434,5.43752,7,7.93145,3.94953,83.09,42.955,3.82  
219,7.43719,13.9426,23.74,111.38,16,18,5,6.90176,0.778912,6,3017,83.09,399.437,1  
944,1944,59,6,8,12.86,0.53,3,1,1,0.96,41.75,0.96,0.96,0.96,0.96,0.96,0.96,0.96,0  
.96,0.96,0.96,CYP3A  
56,75,45,59,117,186,248,280,231,156,113,67.8496,0,13.4086,0,0,29.0987,11.1465,11  
.0359,14.2726,23.8686,0,0.026741,0.005129,-0.010434,-0.012621,0.005754,-  
0.006503,0,0,0,0.004259,-  
0.00562,342.592,129.183,160.109,178.59,127.289,117.347,31.3288,49.0356,50.516,98  
.9241,109.268,3131.91,2425.45,1214.39,4362.58,8285.47,11968.7,13699.2,12894,9594  
.82,6281.1,4154.56,0.851348,0.030338,-0.020751,-0.398371,-  
0.158944,0.201442,0.012143,-0.034447,-0.258364,0.373678,-  
0.185714,3742.45,5327.77,3381.02,3965.26,7633.23,12097.3,15767,17601.3,14609.9,1  
0108.6,7550.05,1.00732,0.01462,-0.04191,-0.46496,-0.193071,0.254572,-0.020537,-  
0.03469,-0.255125,0.397811,-  
0.19393,27,0,0,3,2,0,1,1,2,0,0,0,8,0,0,1,1,0,0,0,0,1,0,49,0,0,0,0,0,0,0,0,0,6,20  
,51,31,24,34,34,0,16,23,15,21,20,39,21,13,36,31,2,35,23,28,32,37,20,34,37,22,33,  
1,32,22,30,20,24,23,20,15,21,19,5,31,17,16,14,17,15,16,16,9,10,23,16,14,12,14,12

[illegible]



,8,7,8,12,4,7,9,10,540.959,0.081103,21,22,1,6,6,1,3,55,1.84,56,1,1,16,17,19.8112  
,12.9348,2,13.8604,6.26898,0.909354,1,1,0,1,0,0,1,1,0,0,95.94,0,7,2,97.96,1,0,81  
93,2341.56,5628.46,7256.05,23.2806,11.87,10.3712,6,8.48696,5.01699,95.94,39.71,4  
.49704,7.7533,12.9348,23.97,99.57,11,11,10,7.97328,0.78767,5,2247,95.94,376.447,  
1982,1982,38,5,8,3.18,5.49,21,2,2,-0.67,39.42,-0.67,-1.58,-0.67,-0.67,-0.68,-  
0.77,-1.15,-1.5,-1.57,-1.58,CYP3A  
49,53,30,52,102,161,199,213,169,112,75,27.5495,0,13.646,0,0,0,0,0,0,0,0.01967,  
0.00023,0.001299,-0.009132,0.006576,-0.007349,0.00007,0.000604,-  
0.000813,0.000138,-  
0.000623,321.66,134.604,114.602,183.477,154.665,157.187,32.1666,35.2406,64.9373,  
120.197,167.929,2795.3,1694.02,747.685,3854.42,7208.13,10160.1,11126.7,9959.17,7  
148.36,4601.37,2875.48,0.387821,-0.136426,0.157122,-0.207833,0.007282,0.114336,-  
0.116582,-  
0.035946,0.025649,0.028242,0.015167,3136.42,3578.68,2191.15,3373.4,6443.12,10054  
.2,12254.3,12931.4,10274.8,7029.17,4920.54,0.474264,-0.165794,0.20863,-  
0.259232,0.046874,0.079927,-0.110411,-0.035401,0.034584,-  
0.000325,0.034036,25,2,0,0,0,0,1,0,0,0,0,0,3,0,0,0,0,0,0,0,0,0,0,0,45,0,0,0,0,0,0,  
0,0,0,7,12,41,23,28,26,23,1,16,18,14,8,14,34,15,8,15,37,1,13,21,28,23,26,27,19,2  
8,23,23,2,31,18,18,20,15,12,15,8,16,16,5,14,12,14,15,18,14,19,14,8,10,17,9,11,8,  
13,8,9,11,2,6,6,0,3,9,6,5,8,8,4,7,3,4,11,7,4,3,1,4,2,5,4,3,2,1,0,1,1,1,3,0,2,1,0  
,0,447.746,0.11608,23,26,4,0,0,0,6,49,1.54,52,4,0,6,6,16.2423,11.0438,4,11.3924,  
3.04129,0.969598,0,0,0,0,0,0,0,0,0,0,0,0,37.3,4,2,1,88.38,0,0,3378,831.67,3398.69,35  
73.89,16.4675,5.77156,3.66514,6,3.91025,3.30713,37.3,35.448,3.54543,6.13734,11.0  
438,21.37,92.99,17,20,2,5.97465,0.856252,5,2112,37.3,310.43,1053,1053,49,2,3,17.  
08,-10,6,1,1,3.69,35.61,3.69,3.69,3.69,3.69,3.69,3.69,3.69,3.69,3.69,3.69,CYP3A  
61,113,105,63,112,153,156,141,124,119,114,331.703,40.6739,59.7803,161.856,95.980  
6,87.8665,74.706,60.4048,0,55.0724,46.6516,0.518855,-0.139436,0.111473,-  
0.201576,0.010251,-0.169232,0.110329,-0.007568,-  
0.000565,0.038346,0.009293,1004.17,723.602,730.131,1009.72,1244.7,1262.3,1027.95  
,673.32,463.271,525.817,631.968,3128,5479.66,4888.48,3925.46,6265.89,7617.5,7355  
.31,6573.56,6000.46,5924.85,5712.63,0.923852,-0.401958,0.332976,-  
0.635582,0.430028,-0.484617,0.287212,0.023293,-0.068269,-  
0.071817,0.274028,4756.53,8156.25,7566.43,4921.92,8485.2,11388.9,11982.4,10921.7  
,9725.59,9464.84,8613.8,2.08171,-0.903269,0.804079,-1.32311,0.949211,-  
1.32214,0.838148,-0.08585,0.018757,-  
0.138911,0.459228,25,0,6,9,11,9,9,10,15,6,9,5,11,15,9,5,3,6,5,14,6,8,5,44,2,7,11  
,6,4,10,10,7,7,4,15,53,15,18,37,9,0,12,14,2,12,21,11,7,9,24,12,2,24,14,18,20,8,1  
8,19,16,21,21,15,28,12,11,9,9,11,9,9,7,17,7,8,12,12,23,9,20,16,17,22,23,8,13,18,  
9,17,11,9,12,11,12,12,1,15,10,16,16,15,6,18,16,9,10,12,13,10,14,11,15,13,12,14,6  
,14,1,16,7,9,9,7,9,7,10,5,8,614.737,0.15641,21,23,1,12,12,2,0,61,1.22,63,3,2,15,  
17,23.8467,15.78,3,19.5563,8.31554,0.986398,1,0,0,0,0,0,0,0,0,1,0,113.6,0,8,3,127.  
07,0,0,23152,2713.12,16505.6,18632.4,27.5853,13.3472,11.995,6,5.56578,3.03861,12  
1.98,50.947,6.18955,10.2085,15.78,26.79,126.98,18,18,7,10.1788,0.915692,6,5456,1  
13.6,494.004,3998,3998,49,7,11,4.32,0.3,10,3,3,3.43,49.61,3.43,2.29,3.43,3.41,3.  
27,2.8,2.39,2.3,2.29,2.29,CYP3A  
81,168,183,87,163,226,250,254,243,211,186,152.535,52.6704,0,0,81.2828,39.8319,45  
.1133,40.4378,49.8924,61.3493,0,0.36101,-0.083424,-0.044177,-0.030411,-  
0.112413,-0.06778,0.020733,0.00028,-  
0.026421,0.082057,0.022779,947.751,651.497,498.094,935.491,1366.2,1457.06,1372.6  
8,1212,1090.04,915.51,712.941,4978.39,9614.64,9445.3,6599.39,11356.7,14396.5,150  
47.5,14416.7,13458.2,11790.7,10615.9,1.26448,0.176512,-0.388789,-  
0.809501,0.15778,0.245416,-0.28337,-0.01516,-0.055288,0.291696,-  
0.175706,5907.91,12472.3,12795.5,6496.99,11778.4,16349.4,18463.8,18222.9,17211.6  
,15255.5,13899.9,2.05744,0.069735,-0.599839,-1.15363,0.275175,0.157474,-  
0.425162,-0.043539,-0.044572,0.524896,-  
0.205688,37,1,18,18,17,21,22,12,14,19,10,13,3,11,21,9,18,12,8,18,15,13,7,67,10,7  
,17,15,14,5,9,11,15,7,25,65,34,26,43,17,0,15,27,11,19,27,25,15,23,35,31,3,15,33,

35,44,20,20,29,19,28,30,14,34,27,24,25,20,18,21,16,19,19,16,22,25,29,28,25,26,28  
,22,24,18,16,30,22,20,23,19,22,28,18,18,19,1,23,20,14,28,24,22,23,20,16,18,19,19  
,19,27,23,20,25,19,22,21,19,2,21,19,12,13,22,23,28,16,13,19,717.616,0.198684,33,  
38,5,10,11,2,1,81,0.96,87,1,1,10,12,29.8797,20.817,7,22.6337,10.1328,0.997002,0,  
1,0,1,0,0,0,0,0,1,112.51,3,10,1,205.33,6,1,41993,1960.84,25339.8,26510.8,31.5918  
,12.893,9.08599,6,4.4529,3.06161,112.51,64.524,6.77208,11.5756,20.817,35.59,161.  
33,33,37,5,12.469,0.955305,5,12491,112.51,586.678,7049,7049,86,7,10,7.55,10.55,1  
,1,1,-1.01,63.01,-3.97,-1.01,-3.75,-3.09,-2.35,-2.03,-1.93,-1.61,-1.15,-  
1.01,CYP3A  
51,58,31,54,108,172,212,236,190,121,83,27.3153,0,13.5111,0,0,0,0,0,0,0,0.01949  
, -0.000571,0.001123,-0.009042,0.006507,-0.00721,0,0,0,-  
0.00049,0.000659,258.686,85.1525,114.324,152.12,104.879,74.6779,0,0,0,55.6229,83  
.4696,2824.91,1821.52,767.767,3915.07,7414.55,10574.8,11601,10695.6,7741.81,4895  
.35,3110.1,0.376065,-0.141418,0.159406,-0.194664,0.008776,0.096665,-0.112993,-  
0.029925,0.019441,0.04076,0.010678,3212.21,3894.55,2284.8,3441.68,6706.74,10594.  
5,12873.4,14071.1,11338.8,7477.22,5343.85,0.463067,-0.175145,0.210987,-  
0.244724,0.042334,0.067691,-0.108594,-  
0.028649,0.028,0.01196,0.033984,27,1,0,0,0,0,1,0,0,0,0,0,3,0,0,0,0,0,0,0,0,0,0,5  
2,0,0,0,0,0,0,0,0,0,5,12,47,25,28,30,25,1,13,23,12,16,13,36,12,11,13,29,1,22,26,  
30,26,33,25,28,26,23,29,1,26,26,22,14,19,12,22,11,16,11,4,12,14,18,18,22,7,25,14  
,9,10,20,9,12,14,10,12,9,7,6,6,6,0,7,7,7,6,8,8,2,4,8,6,12,5,3,3,2,4,8,4,1,4,1,2,  
1,4,2,1,2,2,1,1,0,0,457.404,0.117016,23,26,4,0,0,0,6,51,1.54,54,4,0,6,6,16.2423,  
11.0438,4,11.394,3.29414,0.969769,0,0,0,0,0,0,0,0,0,0,37.3,4,2,1,88.38,0,0,3378,  
838.549,3436.34,3649.86,16.4675,5.77156,3.66514,6,4.04455,3.39722,37.3,35.64,3.5  
6115,6.158,11.0438,22.06,92.03,17,20,2,6.01618,0.85028,5,2112,37.3,312.446,1053,  
1053,49,2,3,17.91,-  
10,6,1,1,3.81,35.85,3.81,3.81,3.81,3.81,3.81,3.81,3.81,3.81,3.81,3.81,CYP3A  
51,91,92,54,99,132,152,158,137,129,105,51.4155,19.4868,0,0,35.424,7.03323,0,16.0  
987,0,12.6041,0,0.210319,-0.050842,0,-0.011396,-0.088738,-0.002326,-0.002665,-  
0.009655,-  
0.017353,0.017897,0.059917,428.847,152.379,0,424.471,530.28,475.55,429.716,261.6  
41,205.017,279.594,264.902,3040.37,3810.52,3317.92,4029.55,6921.54,8673.79,9010.  
39,8220.34,6860.3,5919.46,4580.54,0.605983,0.316135,-0.137692,-  
0.385607,0.162628,-0.037886,-0.0822,0.085412,-0.033862,0.026186,-  
0.232852,3424.45,5852.04,5659.74,3767.58,6765.33,9028.85,10403.3,10532.5,8948.15  
,8539.13,6922.17,0.799676,0.255491,-0.217977,-0.467378,0.23033,-0.073939,-  
0.081671,0.001528,-0.003546,-0.033847,-  
0.053409,24,0,1,2,2,2,1,0,3,0,0,0,10,1,0,0,0,0,0,0,0,0,0,0,35,0,0,0,0,0,0,0,0,0,7,  
11,36,24,19,8,13,0,13,19,7,9,21,12,9,21,21,14,1,12,12,24,18,20,15,28,9,24,15,11,  
16,25,15,14,19,19,14,15,17,19,9,17,15,15,21,16,16,14,16,17,17,7,19,18,11,13,23,1  
2,10,12,11,9,0,14,10,16,19,13,10,11,10,11,13,14,10,7,10,7,5,6,5,6,7,7,1,6,2,4,5,  
2,5,4,3,5,0,448.368,0.080613,16,18,2,9,10,2,2,51,1.31,54,2,1,9,9,17.5517,12.1177  
,4,11.968,5.90344,0.931288,0,1,1,1,0,0,0,0,0,1,51.37,2,5,2,95.4,2,1,5260,1431.9,  
3930.74,4424.44,18.3673,7.55265,5.7363,6,5.44009,3.56672,51.37,40.918,3.80248,6.  
72684,12.1177,22.38,101.81,16,19,3,6.45642,0.779135,5,2587,51.37,338.447,1442,14  
42,45,2,3,11.62,7.07,4,2,2,2.47,39.82,-1.51,2.46,-1.35,-1.17,-  
0.54,0.4,1.36,2.13,2.42,2.46,CYP3A  
67,166,133,71,135,193,245,275,261,246,212,40.4376,12.6953,13.2064,0,0,0,0,0,0,0,  
0,0.031855,0.007996,0.002437,-0.00951,0.004404,-0.007144,-0.005163,-0.001793,-  
0.002981,0.007885,-  
0.002416,515.446,299.175,208.54,418.829,420.37,366.949,262.15,343.116,425.297,47  
0.796,410.959,4044.07,6749.26,4908.05,5502.37,9995.13,13835.9,15730.1,15924.2,14  
310.7,12274.2,9619.54,0.480168,0.041618,-0.093843,-0.193249,-0.009993,0.057976,-  
0.174868,0.034687,0.063862,-0.022272,-  
0.006338,4290.33,10826.5,8668.73,4676.45,8722.9,12442.1,15369.8,16943.3,16139.2,  
15412.9,13580.5,0.546297,0.047696,-0.038894,-0.256115,0.055548,0.032444,-  
0.165286,0.031148,0.025947,0.012263,-

0.050424,34,1,6,2,2,6,2,4,3,1,1,8,0,2,3,3,2,0,0,1,1,1,54,0,0,1,0,0,0,0,0,5,2  
1,50,29,25,24,32,1,22,18,18,18,29,41,18,20,34,28,1,29,20,28,40,19,29,43,30,41,50  
,9,36,28,27,26,34,23,35,22,19,47,8,24,35,23,23,27,28,27,27,25,35,19,40,25,26,25,  
24,32,19,20,19,24,1,29,25,25,16,22,25,12,25,15,13,19,18,18,22,18,10,9,11,18,9,8,  
2,12,9,12,9,8,11,4,5,1,3,607.403,0.030238,26,30,4,6,6,1,5,67,1.46,71,5,1,9,10,22  
.673,15.2708,5,13.1032,4.21382,0.471525,0,0,1,0,0,0,0,0,0,0,40.54,4,3,1,141.92,0  
,0,9882,3679.44,4172.4,6360.07,23.7284,8.89668,6.17751,6,8.6521,4.67651,40.54,50  
.255,4.06708,7.46083,15.2708,29.21,132.58,23,26,3,7.21499,0.756261,5,4848,40.54,  
429.594,2590,2590,65,3,4,12.79,4.89,10,1,1,5.2,50.04,1.45,5.2,2.32,3.3,4.26,4.95  
,5.17,5.19,5.2,5.2,CYP3A  
30,2,0,31,54,74,77,79,67,39,12,53.552,0,0,0,42.9151,0,35.0512,0,0,0,0,0.127979,0  
,0,-0.02169,-0.022214,-0.019786,-0.000084,0.000164,-  
0.00038,0,0,429.193,0,0,344.009,385.188,528.963,540.045,341.158,134.233,0,0,1422  
.6,38.4784,0,1824.05,2974.86,3711.74,3542.2,3005.49,2073.76,991.497,270.076,0.50  
1413,0.00705,0,-0.297836,0.117445,-0.282251,0.395301,-0.161272,-0.029606,-  
0.031503,0.031966,2253.9,113.659,0,2344.7,4020.99,5675.48,6088.13,5766.4,4389.45  
,2401.61,703.475,0.83193,0.00705,0,-0.406098,0.170182,-0.501388,0.575692,-  
0.219378,-0.03116,-  
0.043047,0.032181,12,2,0,0,0,0,0,0,0,0,0,0,8,0,0,0,0,0,0,0,0,0,0,0,19,0,0,0,0,0,0,  
0,0,0,1,12,21,7,5,15,4,0,6,8,5,11,17,6,8,4,11,13,2,11,11,7,18,10,6,10,8,4,5,8,19  
,3,7,2,4,6,3,1,4,8,2,7,5,5,4,1,4,4,3,6,3,5,0,1,4,3,2,3,3,2,0,3,0,1,1,1,0,1,1,0,1  
,0,0,5,0,0,0,0,0,0,0,0,0,0,0,0,0,0,0,0,0,0,0,0,0,299.12,0.05526,10,11,1,6,6,1,0,  
30,1.94,31,1,1,4,5,11.596,7.71438,2,8.65098,4.39865,0.903054,0,0,0,0,0,0,0,0,0,0,  
,58.2,0,4,2,49.68,1,0,938,515.775,1200.8,1203.71,12.4567,5.10417,3.02973,6,3.574  
53,2.28915,58.2,23.796,2.58654,4.98532,7.71438,13.31,59.04,12,12,2,4.91342,0.735  
29,6,637,58.2,218.252,385,385,29,2,4,11.13,-  
3.81,3,2,2,1.49,23.07,1.49,1.46,1.49,1.49,1.49,1.49,1.49,1.49,1.49,1.49,1.48,CYP3A  
32,32,18,34,51,69,73,64,55,48,40,125.937,35.0994,35.2859,0,0,52.798,91.2111,40.2  
486,52.6648,47.8589,12.4455,0.084012,0.004163,0.000612,-0.023487,0.023281,-  
0.036997,0.01191,-0.006021,0.004747,-0.010996,-  
0.00922,797.406,299.443,118.616,813.425,1223.3,1463.03,1294.69,994.606,862.342,7  
13.55,462.823,1982.58,1030.87,472.794,2494.26,3821.14,4542.71,4198.34,3521.38,28  
59.32,2260.14,1642.15,1.40908,0.300521,0.074569,-0.732754,-  
0.104005,0.025798,0.328614,-0.338951,0.036972,0.306978,-  
0.459998,2811.67,2550.87,1451.12,3059.12,4570.6,6109.78,6391.58,5598.22,4765.25,  
4081.04,3325.37,1.43638,0.172007,0.087608,-0.834525,0.15183,-0.244153,0.486895,-  
0.386572,0.028635,0.303386,-  
0.364801,5,5,3,0,2,2,1,0,2,0,0,0,1,1,0,0,0,0,0,0,0,0,0,10,0,0,0,0,0,0,0,0,0,0,17  
,22,2,7,17,10,0,7,2,4,0,10,0,4,14,8,7,1,5,2,16,8,4,2,4,12,11,12,18,9,9,9,6,3,2,1  
,7,5,3,5,5,9,3,6,7,11,1,3,7,4,0,3,9,9,1,6,3,2,1,6,4,0,1,1,5,3,6,3,4,6,3,3,0,0,2,  
5,2,1,5,2,4,3,0,0,4,1,1,2,0,1,3,0,2,1,316.788,0.135864,10,12,1,12,12,2,0,32,1.74  
,34,2,2,6,7,16.0161,10.3799,3,12.0614,2.57664,0.976053,0,0,0,0,0,0,0,0,0,0,127.4  
5,0,7,5,79.35,1,0,3199,777.514,3574.2,4184.07,16.8438,6.48148,4.75,6,3.62598,2.1  
648,127.45,30.354,3.7578,6.39255,10.3799,15.19,76.86,16,17,1,6.47803,0.886784,6,  
1846,127.45,302.236,986,986,40,7,8,4.55,-  
10,4,5,5,0.58,28.48,0.58,0.01,0.58,0.58,0.58,0.58,0.58,0.58,0.57,0.48,CYP3A  
52,88,62,55,97,130,133,142,137,141,126,74.8733,13.5601,19.0362,0,4.90897,30.5748  
,23.1393,2.00233,19.7441,9.43837,4.03849,0.081587,0,0,-0.021112,0.000075,-  
0.014062,0.003341,-0.005704,-  
0.003389,0.000057,0,547.301,82.0602,117.805,592.757,821.587,965.364,704.199,509.  
007,289.448,164.192,70.7394,2986.93,3427.84,2549,3830.56,6220.56,7994.24,7819.85  
,7867.26,7330.91,6494.36,4924.95,0.684933,0.048542,-0.048303,-0.249739,-  
0.255705,0.245223,-0.043384,-0.095836,0.081762,-  
0.082794,0.025234,3513.45,5710.01,4197.79,3925.43,6786.11,9014.98,9103.59,9561.5  
2,9124.61,9057.81,7944.48,0.833852,0.003483,-0.088771,-0.365803,-  
0.151508,0.214749,-0.094489,-0.054633,0.057924,-  
0.131082,0.12051,24,0,9,8,9,2,1,6,4,4,7,7,9,4,3,4,3,2,

,1,1,3,15,39,11,19,23,9,0,4,11,5,8,33,4,12,4,16,22,1,12,22,18,20,9,13,23,20,19,2  
2,13,18,13,13,12,14,9,12,16,19,21,10,12,16,16,25,16,17,10,20,13,13,4,9,20,14,12,  
8,18,17,8,9,12,1,15,14,18,15,7,6,5,8,9,14,10,5,6,15,6,8,7,8,3,6,8,0,9,6,7,7,5,7,  
6,4,10,4,485.633,0.119911,15,18,2,12,12,2,0,52,1.35,55,2,2,6,7,18.4765,13.3477,4  
,15.0054,1.10942,0.96832,0,1,0,1,0,0,0,0,0,1,48.3,0,5,1,102.48,2,0,8420,1590.13,  
6367.88,7219.96,20.28,10.1563,7.39556,7,7.17413,4.32019,73.6,43.341,4.44841,7.79  
188,13.3477,23.13,114.09,21,23,5,8.56493,0.925778,6,3233,48.3,383.508,1956,1956,  
45,6,6,15.31,8.16,1,1,1,2.42,42.83,-3,2.41,-3,-2.97,-2.73,-1.69,-  
0.09,1.18,2.02,2.36,CYP3A

57,110,78,61,111,153,162,165,153,157,150,105.395,13.9132,26.1274,0,35.2869,6.976  
9,0,44.6963,5.58558,0,8.96928,0.236969,0.041996,0.03723,-0.010592,-0.106393,-  
0.016129,-0.000635,0.016074,0.003634,-0.012966,-  
0.018102,622.212,268.851,328.235,631.272,823.606,708.707,588.809,488.866,389.078  
326.544,277.363,3567.96,5210.77,4056.57,4672.76,7878.23,9709.43,10020.2,9822.98  
,9017.12,8255.96,7037.44,0.634724,0.019295,-0.143901,-0.380408,0.176092,-  
0.01524,-0.29562,0.23581,-0.018836,-  
0.0392,0.035361,4054.76,7449.71,5694.85,4437.51,7843.95,10567.3,10976.8,10898.1,  
10323.9,10682.2,9996.07,0.831087,0.042246,-0.058755,-0.483168,0.237647,-  
0.041896,-0.258937,0.221816,-0.089571,-  
0.022777,0.007571,25,0,8,8,4,8,5,4,7,7,5,9,3,5,4,5,8,6,6,4,6,9,7,50,8,6,6,0,2,4,  
4,6,3,10,14,41,13,24,22,16,0,9,20,10,9,25,11,7,21,14,19,1,12,24,23,14,24,11,31,2  
4,7,10,17,26,26,14,13,9,11,10,15,18,14,9,15,12,11,21,19,16,18,22,21,11,7,17,11,7  
,9,14,21,14,14,11,18,0,10,18,8,11,18,8,6,25,12,16,9,10,7,10,9,12,11,3,8,12,5,1,5  
,13,9,11,8,3,9,15,9,7,518.377,0.119825,16,19,2,15,16,3,0,57,1,61,2,2,5,8,21.3717  
,15.0805,5,16.8692,5.0006,0.962146,0,1,1,1,0,0,0,0,1,40.51,0,5,1,124.7,3,1,139  
22,2897.6,10632.1,13095.5,22.7755,10.092,9.79592,6,8.51545,2.66954,40.51,48.937,  
5.49467,8.74578,15.0805,25.28,131.77,26,27,5,9.69218,0.928838,5,4591,39.99,440.9  
41,2921,2921,49,4,5,12.17,8.95,2,1,1,3.57,48.12,-0.25,3.53,-0.25,-0.25,-0.22,-  
0.01,0.66,1.61,2.56,3.29,CYP3A

28,20,12,29,46,58,57,47,36,35,29,249.995,0,0,155.902,48.9357,21.9462,10.9853,50.  
2184,40.8856,0,5.75545,0.366835,0.005487,-0.002521,-0.211782,0.067121,-  
0.161767,0.176954,-0.04008,0.002081,-0.0088,-  
0.01011,739.951,74.8818,19.3793,789.256,957.555,958.252,821.895,689.48,484.154,2  
83.985,173.346,1574.14,664.24,326.612,1929.41,2920.93,3303.06,2984.48,2408.45,18  
73.16,1568.9,1122.85,0.467238,-0.063247,-0.012379,-0.335474,0.225588,-  
0.160259,0.014126,-0.056861,0.280742,-  
0.307876,0.160989,2350.93,1324.64,781.149,2467.79,3945.75,4789.74,4805.49,4018.8  
7,3051.06,2710.27,1933.47,1.25917,-0.136904,0.026576,-0.926098,0.621065,-  
0.703549,0.571167,-0.32738,0.494943,-  
0.481416,0.214053,8,0,0,0,0,0,0,0,0,0,0,0,0,4,0,0,0,0,0,0,0,0,0,0,0,0,0,0,0,0,0,0,0,  
0,0,1,12,16,5,7,10,3,0,5,1,1,6,6,16,1,6,5,5,9,0,7,2,5,13,5,4,8,7,6,9,14,8,3,7,5,5  
4,6,5,4,5,2,3,4,6,6,5,9,4,7,0,4,0,3,5,5,6,3,4,1,3,3,2,2,3,2,2,2,1,0,0,5,0,2,1,0  
,1,0,0,0,1,0,0,0,0,0,0,0,0,0,0,0,0,0,0,0,0,291.149,0.059886,5,6,0,12,12,2,0,28,1.8  
4,29,1,1,5,6,12.3031,8.07732,2,9.4831,5.64993,0.860386,0,0,1,0,0,0,0,0,0,0,0,0,85.08  
,0,5,3,51.29,1,1,1649,779.777,1530.05,1979.21,13.4321,5.76,5.92817,6,5.05921,3.2  
0232,93.46,26.613,2.933,6.12364,8.07732,12.74,65.75,12,12,2,5.44683,0.548604,6,8  
18,85.08,249.29,536,536,23,5,7,8.54,3.96,6,2,3,1.21,25.45,-1.73,0.22,-  
0.75,0.2,0.91,1.15,1.19,1.18,1.09,0.69,CYP3A

57,93,72,59,100,126,140,152,173,178,143,44.8554,20.9767,0,0,0,7.13306,0,0,0,0,0,  
0.003725,0.000114,0.000001,-0.000605,-0.000064,-0.000244,-0.000228,-0.000346,-  
0.000324,-  
0.000216,0.00005,693.625,225.779,64.6323,723.741,943.748,951.169,876.017,1065.19  
,1128.17,879.745,496.946,3564.21,4178.08,3394.87,4518.96,7119.76,8849.07,9483.75  
,10196.5,10390.7,8980,6359.36,0.394058,0.048288,0.004153,-0.074768,-  
0.158928,0.057294,-0.015569,-0.027827,0.028333,-0.006998,-  
0.031836,3699.12,6033.89,4654.15,4002.47,6698.25,8344.94,9131.42,9992.14,11315.1  
,11533.6,9214.76,0.37636,0.045775,0.010456,-0.082696,-0.133578,0.048138,-

[illegible]

```
0,0,0,0,14,22,11,16,19,5,0,7,7,4,7,26,4,4,12,15,15,0,8,13,11,13,9,8,16,11,7,18,1
2,22,10,8,12,6,9,6,13,9,12,3,10,13,12,8,1,15,5,11,8,12,4,10,13,9,5,6,5,5,2,4,2,0
,8,1,2,4,4,6,3,2,2,2,10,3,4,2,2,0,1,2,0,1,0,1,1,0,0,0,1,1,0,0,1,0,388.966,0.0818
17,7,8,0,12,12,2,1,38,1.72,39,1,1,7,8,13.6649,9.1647,2,11.0251,2.95835,0.922488,
0,1,0,1,0,0,0,0,0,1,16.13,0,2,0,59.85,1,1,2256,1069.49,2770.52,3358.66,15.39,7.6
9527,7.3728,6,6.89411,2.97366,16.13,31.839,3.61919,6.00811,9.1647,16.79,80.85,12
,12,5,6.29696,0.83504,6,1042,16.13,274.788,718,718,25,3,3,20,9.42,1,0,0,3.5,31.6
2,-2.01,3.39,-1.96,-1.66,-0.96,-0.36,0.19,1.07,2.04,2.92,CYP2D6
56,102,76,59,102,140,156,158,166,164,130,6.001,0,0,0,0,2.99918,0,0,0,0,0.00003
6,0.000014,0.000001,-0.000002,0.000003,-0.000018,-0.000005,-0.000004,0.000004,-
0.000009,0.000012,633.205,333.121,448.109,627.033,718.572,584.584,393.764,412.98
7,318.624,245.958,258.448,3032.89,4492.55,3632.15,3882.29,6301.65,7930.16,8372.5
2,8219.32,8000.4,7186.53,5599.18,0.311699,0.00114,0.004917,-0.04205,-
0.170688,0.061689,0.00315,-0.013412,-0.00271,-
0.023582,0.012986,3509.89,6239.05,4713.66,3883.91,6625.8,8884.3,9743.72,9863.37,
10318.5,10067.5,7954.56,0.311111,0.001345,0.006358,-0.041777,-
0.168965,0.061559,0.001536,-0.013544,-0.003378,-
0.023301,0.012899,28,1,6,5,11,2,6,8,9,9,1,5,3,10,4,4,2,10,3,2,11,4,7,53,7,4,3,1,
6,5,3,3,5,3,18,48,13,20,25,10,0,4,5,10,11,45,6,4,11,24,27,0,16,28,15,32,10,12,15
,25,21,31,19,31,10,18,11,13,14,11,13,14,19,7,17,20,22,18,25,16,11,9,22,18,5,15,1
6,13,16,8,14,10,14,13,15,0,10,13,10,12,13,14,13,6,13,6,6,8,12,10,8,10,6,8,15,8,7
,0,9,8,7,5,5,7,11,10,8,6,517.021,0.140346,10,13,1,18,18,3,0,56,1.19,59,3,3,4,7,1
9.0205,13.899,4,16.3655,0.027387,0.979918,0,2,0,2,0,0,0,0,0,2,6.48,0,2,0,104.12,
1,0,10862,1516.27,7604.2,8585.11,21.2404,11.4075,10.5625,6,7.27723,2.86695,6.48,
46.714,4.90132,8.29733,13.899,25.08,119.86,24,24,6,9.15862,0.972378,6,3571,6.48,
368.514,2320,2320,40,2,2,20,8.32,1,0,0,6.14,46.58,0.75,6.13,1.65,2.2,2.42,2.94,3
.84,4.8,5.65,6.06,CYP2D6
26,3,0,27,46,61,66,60,33,18,11,31.7238,0,0,0,18.3717,0,0,0,0,0,0,0,0.175224,0,0,-
0.029249,-0.058691,-0.000358,0.001369,-0.000668,0.000303,-
0.000319,0,304.536,0,0,286.442,272.744,179.472,179.666,211.582,148.619,54.3832,0
,1167.21,49.154,0,1488.33,2413.74,2891.85,2654.58,1968.01,1012.97,495.004,233.91
8,0.372819,0.026743,0,-0.277295,0.284332,-0.26307,-0.004361,0.072626,0.026184,-
0.044505,-
0.007064,1736.1,182.986,0,1891.74,3147.03,4092.39,4310.37,3811,2156.7,1211.44,70
7.457,0.688881,0.026743,0,-0.513118,0.427253,-0.295694,-
0.048341,0.073603,0.058802,-0.051376,-
0.022312,10,1,0,0,0,0,0,0,0,0,0,0,0,4,0,0,0,0,0,0,0,0,0,0,18,0,0,0,0,0,0,0,0,1
0,15,11,4,8,7,0,2,4,3,6,11,6,2,4,11,9,0,4,5,7,6,9,7,7,8,12,7,9,6,4,3,3,5,2,2,3,6
,7,2,4,3,3,2,4,0,0,3,2,2,3,4,1,3,1,1,0,2,0,2,2,1,2,0,0,0,0,0,1,0,1,1,4,0,0,0,0,0
,0,0,0,0,0,0,0,0,0,0,0,0,0,0,0,238.326,0.113995,7,8,1,6,6,1,0,26,1.64,27,1,1,3
,3,9.25915,6.27086,2,8.84468,3.4806,0.959863,0,0,0,1,1,0,0,0,0,0,53.11,0,3,3,35.
22,1,0,580,272.279,970.793,1164.52,9.55102,4.02216,3.7037,6,3.25867,2.79726,53.1
1,20.888,2.62103,5.35674,6.27086,11.65,63.85,10,11,0,4.58426,0.651132,6,462,53.1
1,175.23,238,238,18,3,3,20,11.37,1,2,3,1.39,19.88,-1.84,0.01,-1.83,-1.83,-1.83,-
1.83,-1.83,-1.8,-1.6,-0.92,CYP2D6
31,13,4,31,53,67,83,78,56,50,29,3.03322,0,0,0,0,0,0,0,0,0,0,0.000024,-
0.000001,0,-0.000013,0.000002,-0.000001,0,-0.000005,0.000011,-
0.000008,0.000003,253.916,31.4957,0,219.52,197.868,113.655,19.4777,50.8022,103.6
67,125.377,94.2446,1184.63,270.882,71.496,1475.19,2326.55,2770.83,2850.28,2431.7
8,1767.86,1357.16,715.683,0.174974,0.001104,0.00026,-0.026703,-0.06559,-
0.005383,0.014207,-0.001578,-
0.026271,0.013543,0.001922,1933.22,819.924,254.595,2017.41,3365.03,4184.2,5036.6
1,4742.54,3487.31,3062.93,1807.03,0.174869,0.001201,0.000415,-0.0266,-0.064927,-
0.006625,0.014764,-0.001797,-
0.025915,0.013629,0.001419,17,0,1,0,0,0,0,0,0,0,0,1,0,0,0,0,0,0,0,0,0,0,0,27,0,0
,0,0,0,0,0,0,0,1,7,21,11,12,15,5,1,6,4,3,5,20,8,1,13,10,8,0,5,13,12,13,6,4,11,8,
9,6,6,8,8,5,8,4,5,5,4,7,10,4,1,6,2,4,3,4,6,3,7,4,3,1,1,4,2,4,3,3,4,1,2,0,3,1,3,0
```

,2,1,1,2,1,2,9,2,0,1,1,0,0,0,0,1,2,1,1,0,1,1,0,0,0,0,0,3,316.013,0.16886,8,8,0,6  
,6,1,1,31,2.2,31,1,1,8,8,10.3889,6.73638,1,11.8539,0.873225,0.991448,0,1,0,1,0,0  
,0,0,0,1,3.24,0,1,0,36.33,0,0,981,229.398,1757.85,1852.08,12.0714,6.47751,6.1875  
,6,2.43184,2.33699,3.24,23.526,3.20159,6.03648,6.73638,13.6,61.35,6,6,5,6.43335,  
0.963714,6,436,3.24,187.281,337,337,16,1,1,20,7.47,1,0,0,2.87,23.64,-0.95,2.87,-  
0.94,-0.86,-0.44,0.42,1.39,2.27,2.76,2.86,CYP2D6  
56,102,76,59,102,140,156,158,166,164,130,53.6937,16.6647,23.8464,0,0,2.99916,0,0  
,17.1666,0,0,0.002575,0.000458,0.000539,-0.000757,0.000211,-0.000374,0.000314,-  
0.00084,0.000825,-0.000495,-  
0.001145,706.176,421.936,483.857,693.746,849.248,721.916,458.07,408.648,405.685,  
383.097,395.431,3021.12,4473.31,3618.45,3867.88,6279.26,7903.2,8346.42,8190.11,7  
963.44,7148.08,5568.2,0.39439,-0.027752,0.036507,-0.110908,-0.13044,0.095365,-  
0.046272,-0.150616,0.130212,0.10473,-  
0.100168,3770.32,6890.48,4975.61,4089.35,6930.18,9285.28,10028.3,10072.4,10751.6  
,10710.3,8894.72,0.389272,-0.028309,0.034087,-0.120213,-0.112448,0.082129,-  
0.028672,-0.14874,0.106969,0.096467,-  
0.075691,26,0,6,8,3,6,5,11,3,5,5,11,3,9,8,2,1,3,8,3,3,5,7,49,3,2,4,4,1,3,0,3,4,3  
,24,43,11,25,27,10,0,3,6,12,6,42,6,7,12,25,28,0,16,26,18,27,13,10,19,20,22,33,21  
,27,19,15,16,7,14,11,11,11,20,7,20,24,14,31,21,14,13,11,10,16,5,15,25,16,20,10,1  
4,9,7,13,9,0,14,15,14,10,18,16,10,14,8,7,7,7,11,7,11,9,14,15,12,7,6,0,8,9,5,5,7,  
9,10,11,6,6,522.689,0.11957,12,15,1,18,18,3,0,56,1.14,59,3,3,6,9,20.7609,14.6867  
,4,16.5779,1.82403,0.963591,0,2,0,2,0,0,0,0,0,2,6.48,0,2,0,115.09,1,0,13533,2223  
.48,8315.8,10049.8,23.168,11.7438,10.9339,6,6.82409,2.97782,6.48,46.532,5.04483,  
8.47281,14.6867,25.08,120.3,24,24,6,9.49376,0.956603,6,4305,6.48,404.495,2790,27  
90,44,4,4,20,8.05,1,0,0,6.42,45.69,1.01,6.41,1.92,2.47,2.7,3.2,4.09,5.06,5.92,6.  
33,CYP2D6  
56,123,106,59,107,144,161,165,150,135,122,145.774,25.4346,24.7172,0,76.3729,34.5  
262,7.88576,71.0362,89.8725,17.3176,0,0.028117,0,0,0.003686,-0.012082,-  
0.006187,-  
0.003699,0.001166,0.002568,0.000489,0,513.881,142.974,63.2337,481.035,821.999,79  
8.651,599.313,470.444,400.07,276.086,205.923,3224.56,5588.14,4516.89,4189.86,695  
3.76,8648.5,8874.88,8491.32,7587.84,6652.59,5919.46,0.793437,0.036757,0.148423,-  
0.355158,-0.195725,0.225608,-0.115922,-0.043771,0.086479,0.033904,-  
0.089672,4002.27,8616.86,7260.3,4339.01,7672.73,9826.85,10933.9,10972.9,10115.4,  
9342.71,8652.41,0.746979,0.084591,0.101851,-0.350115,-0.189483,0.246807,-  
0.086911,-0.08398,0.091789,0.034988,-  
0.113902,25,0,6,7,4,9,5,5,3,10,2,0,6,5,7,6,5,0,4,2,2,4,1,47,1,4,2,0,1,1,2,1,0,4,  
13,57,12,28,24,9,0,11,13,6,10,33,5,2,18,20,18,0,13,35,20,16,16,13,25,15,23,28,17  
,21,15,26,15,6,16,14,13,12,12,8,20,16,19,14,22,21,22,18,15,16,6,14,19,15,17,17,2  
0,10,15,8,15,0,10,18,12,13,19,17,14,10,16,14,13,11,13,10,15,11,12,17,8,6,14,2,7,  
13,7,8,11,7,7,8,9,6,513.896,0.081438,18,21,2,12,12,2,0,56,1.22,59,2,2,10,11,21.1  
396,14.4528,4,14.0449,1.61088,0.896709,0,2,1,2,0,0,0,0,0,2,29.95,0,4,1,118.6,2,0  
,11825,3037.01,6861.43,9320.99,23.168,10.2924,8.81633,6,5.66506,3.47159,55.25,45  
.227,4.68657,7.65375,14.4528,24.64,117.27,20,22,7,8.50572,0.835033,6,4387,29.95,  
437.523,2618,2618,49,8,8,15.69,9.05,1,1,1,4.28,43.84,-1.97,4.23,-  
0.8,0.04,0.42,0.65,1.29,2.23,3.19,3.95,CYP2D6  
51,89,67,54,96,133,140,131,110,113,112,37.1294,12.1869,0,0,12.0439,0,6.6697,5.08  
075,5.02115,0,0,0.133703,0.041946,0.017191,-0.007615,-0.049237,-0.005179,-  
0.002726,-0.002096,0,-0.010034,-  
0.012559,549.862,197.349,330.452,562.371,695.039,543.177,296.473,101.134,39.8448  
,47.1107,92.5083,2697.51,3885.86,3055.72,3470.38,5697.19,6874.3,6689.16,5991.81,  
5359.58,5363.04,4927.16,0.546828,0.076856,-0.131418,-0.262625,-0.007269,-  
0.020921,0.037373,-0.007305,-0.016653,-0.000589,-  
0.03317,3417.06,5693.4,4392.57,3737.95,6494.02,8798.54,9255.11,8615.01,7176.02,7  
185.61,7130.85,0.627675,0.04147,-0.023558,-0.279781,0.047957,-  
0.073124,0.070122,-0.119234,0.014902,0.041113,-  
0.066496,23,0,5,5,6,4,8,5,3,1,2,3,4,6,5,6,2,5,5,2,3,6,3,47,3,6,6,3,2,3,4,1,2,6,8

7,44,14,17,25,11,0,7,11,5,9,29,8,4,10,18,20,1,9,20,12,21,15,13,20,17,9,15,15,24,1  
7,8,9,8,6,4,11,12,12,7,11,6,14,14,17,11,13,13,12,15,6,12,13,7,8,12,9,6,5,7,12,0,  
8,7,8,19,10,11,7,5,12,12,6,7,12,8,13,3,5,6,1,7,7,2,9,4,9,7,8,4,8,6,6,6,457.12,0.  
207977,11,13,1,15,16,3,0,51,0.98,54,2,2,5,7,17.7694,12.7928,4,18.2195,1.30583,0.  
998094,0,1,1,1,0,0,0,0,0,1,48.13,0,4,2,92.42,2,1,9744,599.804,9719.38,10049.3,19  
.3222,9.46746,9.67714,6,4.66343,2.83277,48.13,42.183,5.41398,9.67937,12.7928,22.  
7,105.94,21,22,5,9.51711,0.882306,5,3030,48.13,347.454,2016,2016,37,2,3,14.4,9.6  
4,2,2,2,3.05,41.63,-0.78,2.89,-0.77,-0.77,-0.77,-0.71,-0.37,0.44,1.4,2.32,CYP2D6  
52,110,72,54,97,139,155,162,142,130,131,30.631,0,0,0,0,12.5185,0,0,0,13.5811,0  
.012284,-0.000173,-0.000025,-0.006241,0.003333,-0.002618,0.000658,-0.001275,0,-  
0.000232,0.000487,512.571,333.199,425.286,468.235,517.544,409.253,213.2,108.661,  
37.8763,73.3468,197.65,2458.87,4011.24,2657.66,3170.85,5283.45,6792.53,6987.62,6  
747.79,6087.84,5588.61,5129.62,0.478046,0.032738,0.039469,-0.164367,-0.083081,-  
0.109057,0.166086,0.063983,-0.061859,-  
0.158352,0.064269,3374.09,6826.18,4655.68,3601.64,6332.49,8963.74,9913.93,10289.  
6,9204.24,8301.63,8137.54,0.554371,0.016653,0.047602,-0.200627,-0.075857,-  
0.13363,0.206669,0.056591,-0.071862,-  
0.199148,0.112615,26,0,3,3,4,7,6,4,4,4,4,5,2,3,4,3,3,5,5,2,2,2,1,51,3,3,4,5,0,3,  
3,5,3,2,14,50,15,20,32,12,0,9,12,5,9,32,7,4,6,21,27,1,12,17,21,28,12,21,19,26,16  
,17,12,26,17,14,15,10,13,13,8,6,11,5,14,9,11,17,12,17,17,19,13,13,9,14,10,7,5,13  
,11,14,20,4,11,1,7,8,7,7,7,9,8,12,11,9,9,15,10,6,9,6,6,9,2,10,9,2,11,6,7,2,3,2,5  
,5,7,4,486.311,0.184476,13,15,1,12,12,2,3,52,1.32,54,2,2,7,9,17.6481,12.1479,3,1  
6.669,4.04204,0.994851,0,1,0,1,0,0,0,0,0,1,40.54,0,3,1,88.96,1,0,6759,739.676,72  
98.7,7619.4,19.7531,9.7963,8.48503,6,4.47476,3.06571,40.54,39.744,4.81662,8.5972  
7,12.1479,22.94,101.51,18,18,6,8.63637,0.938874,6,2408,40.54,337.455,1634,1634,3  
7,3,4,14.4,9.11,2,1,1,3.72,39.83,-0.1,3.67,-0.1,-0.1,-  
0.08,0.08,0.69,1.62,2.58,3.37,CYP2D6  
30,12,0,30,52,62,70,70,60,47,32,20.9077,0,0,0,0,0,0,6.71191,0,0,0,0.0034,0,0,-  
0.000575,-0.000324,-0.000255,-  
0.000546,0,0,0,0,230.654,0,0,222.738,255.731,174.853,53.8838,27.2402,8.794,0,0,1  
063.68,145.565,0,1323.42,2077.89,2429.88,2382.36,2074.2,1610.17,1040.44,522.659,  
0.313952,0.024057,0,-0.099624,-0.073304,0.021873,-0.055852,0.133657,-0.077811,-  
0.082536,0.052565,1887.55,666.636,0,1984.63,3372.38,3997.93,4405.99,4330.88,3719  
.51,2838.39,1841.11,0.296739,0.024057,0,-0.106681,-0.051137,0.02523,-  
0.070545,0.139221,-0.079167,-  
0.082307,0.05296,17,0,0,0,0,0,0,0,0,0,0,0,7,0,0,0,0,0,0,0,0,0,0,21,0,0,0,0,0,0,0  
,0,0,2,12,14,6,15,10,5,0,4,4,4,2,18,2,3,9,8,9,0,7,8,7,9,6,10,11,12,14,5,7,10,7,7  
,8,6,8,4,7,9,5,3,12,6,4,3,3,7,7,7,4,6,3,2,4,3,3,1,1,3,0,1,1,0,1,0,1,0,0,0,0,0,0,  
0,10,0,0,0,0,0,0,0,0,0,0,0,0,0,0,0,0,0,0,0,0,294.321,0.053106,7,7,0,6,6,1,1,30  
2.17,30,1,1,7,7,9.6818,6.27439,1,8.13908,1.30647,0.844214,0,1,0,1,0,1,1,0,0,2  
1.26,0,2,1,33.24,0,0,655,471.473,879.603,1122.87,11.0769,5.67188,4.6875,6,4.4360  
2,2.35983,21.26,21.597,2.62688,4.74153,6.27439,13.01,54.94,6,6,4,4.17474,0.71655  
1,6,356,21.26,179.259,256,256,16,2,2,20,9.99,1,1,1,1.98,21.7,-1.62,1.65,-1.62,-  
1.62,-1.62,-1.61,-1.5,-0.98,-0.08,0.88,CYP2D6  
40,18,3,43,78,109,131,135,117,91,55,17.1477,0,0,0,0,6.31173,0,0,0,0,0,0.011677,0  
,0,-0.000738,-0.002241,-0.000713,-0.002104,0.000142,-0.000161,-  
0.000023,0,386.581,0,0,391.047,459.508,440.652,367.07,397.167,241.634,102.06,0,2  
385.69,408.902,55.1163,3155.06,5398.85,7271.62,7679.44,7204.44,5371.76,3374.49,1  
560.61,0.253122,0.028434,0.006624,-0.038976,-0.145468,0.049277,0.025496,-  
0.003992,-0.029441,-  
0.033306,0.01479,2519,1027.75,167.4,2855.84,5127.12,7092.65,8296.79,8447.98,7223  
.2,5481.32,3205.44,0.229791,0.025065,0.006624,-0.040378,-  
0.11403,0.023633,0.01267,0.026685,-0.025243,-  
0.044862,0.01494,20,0,0,0,0,0,0,0,0,0,0,0,9,0,0,0,0,0,0,0,0,0,0,31,0,0,0,0,0,0,0  
,0,0,3,15,31,10,16,16,8,0,4,5,6,7,25,4,8,12,15,19,0,9,16,15,17,3,9,24,26,14,16,1  
3,12,12,8,13,10,7,6,8,16,16,5,9,10,11,12,10,12,9,10,6,9,6,10,10,9,5,9,5,5,7,4,7,  
0,8,9,4,6,2,4,4,5,1,



16,7,11,2,12,12,2,1,40,1.42,43,2,2,1,1,13.5267,9.8265,4,9.85315,1.41043,0.479076  
,0,1,1,1,0,0,0,0,0,1,6.48,2,2,0,71.92,2,0,1860,1240.05,1412.73,2513.19,13.6484,5  
.65289,3.8144,7,6.51204,2.44682,6.48,32.384,3.12578,5.99738,9.8265,17.76,84.5,19  
,22,0,5.33927,0.64291,6,1416,6.48,264.365,687,687,38,2,2,20,8.31,1,0,0,3.99,32.1  
6,0.13,3.98,0.17,0.19,0.29,0.8,1.7,2.66,3.51,3.91,CYP2D6  
44,75,58,46,81,103,107,102,84,75,69,39.3395,8.27344,0,5.19762,8.11451,21.4212,0,  
3.64444,17.0403,0,7.31166,0.072241,0,0,0.013116,-0.03762,-0.014223,0.000585,-  
0.00013,0.000284,0.001045,0.000822,478.421,65.8004,39.7723,505.306,639.085,581.1  
65,405.696,340.694,225.692,111.135,75.6566,1978.46,2650.39,2022.21,2487.21,3931.  
99,4623.24,4449.99,4054.22,3470.19,3087.97,2823.99,0.46816,0.120237,-0.025762,-  
0.154603,-0.194332,0.180829,-0.106857,-0.021542,0.181971,-0.158516,-  
0.045185,2976.36,4802.12,3640.49,3277.23,5622.77,7051.59,7239.25,6850.92,5681.56  
,5104.1,4687.9,0.607077,0.152941,-0.035576,-0.154083,-0.229636,0.181947,-  
0.148505,0.017363,0.185459,-0.233932,-  
0.03402,21,0,7,3,8,3,4,1,6,1,2,2,7,3,6,3,5,4,2,1,2,1,5,34,5,1,6,3,1,2,2,0,1,2,13  
,33,12,18,22,8,0,2,8,3,6,23,1,2,9,15,14,1,10,20,13,14,12,4,11,11,7,21,12,18,17,3  
,5,4,3,5,2,4,8,7,6,10,12,9,19,9,9,9,2,7,4,9,4,5,5,19,8,8,5,4,4,0,2,7,6,9,9,8,13,  
9,12,9,10,9,7,2,4,4,9,6,4,9,7,1,3,6,7,3,2,5,2,5,6,12,406.175,0.181469,10,12,1,12  
,12,2,0,44,1.35,46,1,1,4,6,15.2005,10.8265,3,15.8394,5.42067,0.993896,0,1,1,1,0,  
0,0,0,0,1,50.28,0,5,1,72.24,2,1,5238,649.256,5885.21,6389.93,16.8438,8.74089,8.4  
4444,6,5.00778,1.69065,50.28,34.756,4.65375,8.2541,10.8265,19.43,91.17,18,18,5,8  
.07559,0.918979,6,1939,50.28,298.383,1243,1243,30,5,5,17.62,6.91,2,1,1,1.86,34.9  
6,-4.57,1.86,-3.81,-2.67,-1.26,-0.08,0.9,1.61,1.83,1.86,CYP2D6  
40,7,3,44,84,126,156,149,106,75,30,50.7879,0,0,0,33.109,0,7.36489,19.4892,6.98  
167,0,0.003984,0,0,0.000573,-0.001215,-0.000826,-0.000559,-  
0.000008,0.000043,0,0,344.561,0,0,286.284,344.436,404.22,297.51,190.857,237.095,  
10.8684,0,2471.57,132.627,40.9059,3425.83,6374.4,8670.35,9183.26,7315.22,4402.31  
,2337.9,700.051,0.722331,-0.022556,0.025793,-0.321671,-0.21299,0.369839,-  
0.245822,-0.079293,0.280825,-  
0.229463,0.074174,2693.64,477.544,190.7,3100.84,5794.1,8522.24,10356.2,9737.19,6  
972.88,4891.72,1913.23,0.674427,-0.018577,0.025793,-0.304827,-  
0.190601,0.333516,-0.214706,-0.081309,0.274535,-  
0.234808,0.073772,17,1,0,0,0,0,0,0,0,0,0,0,0,0,0,0,0,0,0,0,25,0,0,0,0,0,0,  
0,0,0,7,15,30,20,13,14,16,0,13,13,7,11,23,14,8,19,13,25,1,13,21,22,12,15,10,21,2  
6,18,24,8,16,13,12,15,11,10,18,12,9,10,8,12,16,9,7,7,4,9,7,7,7,8,6,6,2,3,3,3,2,3  
,3,3,1,1,1,0,1,1,1,2,0,0,1,0,6,0,0,0,0,0,0,0,0,0,0,0,0,0,0,0,0,0,0,0,0,0,335.338,0  
.031901,15,19,4,6,6,1,5,40,1.59,44,3,1,3,3,14.353,10.1259,5,8.72302,2.93188,0.77  
6216,0,1,0,1,0,0,0,0,1,52.93,4,4,2,82.19,2,0,1815,942.558,1495.02,1806.82,13.4  
4,4.29506,2.69888,6,5.45001,3.27082,52.93,30.593,2.72718,4.98691,10.1259,17.85,8  
0.12,18,22,0,4.99714,0.749182,5,1790,52.93,285.338,712,712,49,4,4,10.22,8.97,1,2  
,2,1.53,30.72,-2.29,1.47,-2.29,-2.29,-2.27,-2.15,-1.6,-0.69,0.28,1.1,CYP2D6  
55,114,44,57,117,183,190,184,195,210,183,2.5027,0,0,0,0,0,0,0,0,0,0,0,0,0,0,0,  
0,0,0,0,0,2.5027,0,0,0,0,0,0,0,0,0,0,2318.29,2722.71,901.973,3124.77,5719.87,790  
4.93,8153.26,7880.72,7733.14,7033.61,5151.44,0.170341,0.02751,0.017405,-  
0.044072,-0.027971,-0.030557,0.004434,0.054293,-0.024539,-0.044987,-  
0.022095,3067.91,6231.35,2383.41,3256.86,6622.15,10247.5,10607.7,10278,10916.3,1  
1693.6,10099.4,0.170341,0.02751,0.017405,-0.044072,-0.027971,-  
0.030557,0.004434,0.054293,-0.024539,-0.044987,-  
0.022095,35,1,0,0,0,0,0,0,0,0,0,0,0,0,0,0,0,0,0,0,0,73,0,0,0,0,0,0,0,0,0,2,2  
,89,15,16,48,10,0,19,21,5,27,10,30,10,9,37,20,0,30,18,38,34,28,15,16,25,16,19,0,  
35,24,34,19,20,21,22,10,13,18,2,28,16,17,21,19,28,25,21,22,22,20,15,12,16,19,10,  
16,22,20,16,12,1,11,5,11,4,7,12,14,13,7,4,17,2,10,4,2,2,0,10,3,3,0,1,0,1,1,0,0,2  
,2,0,0,0,455.817,0.051923,20,22,3,0,0,0,1,55,1.46,57,2,0,2,4,13.6231,9.93265,3,1  
0.527,0.837935,0.736553,0,1,0,1,0,0,1,1,0,0,12.03,0,1,1,65.92,1,0,25

27,1,1,20,10.58,1,1,1,4.95,35.12,1.34,4.27,1.34,1.34,1.34,1.35,1.39,1.66,2.41,3.  
36,CYP2D6  
30,25,21,30,47,62,62,55,48,38,33,58.1094,0,0,0,47.4561,0,18.4948,0,0,0,0,0.34404  
3,-0.000205,0.00008,-0.02783,-0.123241,-0.084606,0.063936,-0.000625,0.000757,-  
0.000981,0.000694,416.694,149.505,54.787,401.753,387.049,256.255,181.006,186.285  
,265.78,298.475,251.189,1125.12,714.576,478.773,1365.04,2024.38,2345.07,2143.47,  
1839.2,1527.18,1226.98,995.562,0.612019,-0.05188,-0.004195,-0.520523,0.61414,-  
0.752804,0.625398,-0.436013,0.167186,-  
0.028207,0.061386,2097.83,1763.76,1405.14,2203.42,3351.39,4274.88,4225.06,3733.7  
2,3267.46,2649.93,2308.28,1.24976,-0.054305,-0.008736,-0.906471,0.815333,-  
1.14807,1.08511,-0.645918,0.180872,-  
0.0398,0.092832,9,2,0,3,0,1,0,0,1,0,0,0,7,1,0,1,0,0,0,0,0,0,0,0,17,0,0,0,0,0,0,0,  
0,0,17,14,11,4,14,2,0,2,4,3,7,14,1,3,8,8,7,0,6,9,3,10,0,10,6,14,8,7,12,10,1,1,4  
,1,4,6,5,5,6,1,4,4,6,4,3,3,6,6,5,7,2,6,1,1,1,2,4,3,3,3,2,2,0,1,5,1,7,4,3,1,5,3,2  
,3,3,2,2,0,2,2,0,2,0,0,2,0,2,0,2,3,1,1,1,1,297.208,0.175865,9,9,0,6,6,1,0,30,1.8  
6,30,1,1,9,9,11.096,7.18154,1,12.1361,4.23371,0.993179,0,0,0,1,1,0,0,0,0,0,97.78  
,0,5,6,38.96,0,0,1524,282.609,2423.69,2527.74,13.0667,7.30247,8.96,6,3.05203,2.3  
9137,97.78,24.073,3.57069,6.12903,7.18154,13.59,80.72,6,6,3,6.18176,0.980103,6,5  
58,97.78,205.26,450,450,15,5,5,20,11.01,5,5,6,1.19,22.48,-5.27,0.11,-5.27,-  
5.27,-5.26,-5.18,-4.77,-3.87,-2.57,-1.05,CYP2D6  
45,80,82,46,83,103,111,124,108,83,85,84.8544,0,0,0,11.4147,26.2731,78.4346,55.03  
08,0,14.714,7.59179,0.085234,0,0,-0.025388,-0.003033,-0.012076,0.001784,-  
0.003904,0,0,0,413.318,0,0,394.427,544.213,626.382,495.671,176.264,20.1561,40.28  
65,18.0304,1971.8,2903.91,2209.22,2490.69,4036.3,4823.9,4771.39,4582.86,3921.16,  
3353.54,3250.44,0.704347,-0.20353,-0.03295,-0.26399,-0.117967,-  
0.237974,0.438925,0.004443,-  
0.379592,0.28443,0.064763,3164.36,5341.09,5118.61,3344.63,5853.06,7339.52,7955.6  
5,8703.74,7728.25,5942.17,5759.68,0.841459,-0.197116,-0.027822,-  
0.387248,0.103392,-0.490808,0.487874,0.134044,-  
0.435254,0.250273,0.048463,22,0,0,0,0,0,0,2,0,0,0,12,0,0,0,0,0,0,0,0,0,0,29,0,  
0,0,0,0,0,0,0,2,17,28,6,20,13,13,0,9,14,3,10,22,10,9,11,13,12,1,10,17,17,14,12  
,22,16,19,19,17,7,21,15,14,22,12,11,18,11,10,13,9,16,17,10,14,17,8,15,11,12,19,6  
,11,16,9,16,11,5,14,7,5,9,0,7,15,7,7,9,4,7,9,3,4,14,9,4,2,4,1,2,3,2,1,4,1,5,1,3,  
0,3,0,2,2,1,1,454.832,0.106971,16,17,1,6,6,1,1,45,1.77,46,1,1,11,12,16.1125,10.6  
169,2,11.5727,6.49447,0.959564,0,1,0,1,0,0,0,0,1,50.8,0,5,1,74.77,1,0,3788,130  
3.4,4630.34,5186.4,18.3403,8.74089,6.57439,6,4.47234,2.90815,50.8,34.824,3.86986  
,5.87322,10.6169,19.48,90.56,11,11,6,7.25955,0.970424,5,1372,50.8,371.27,1080,10  
80,34,4,5,12.36,9.13,2,1,1,1.95,34.73,-1.87,1.89,-1.87,-1.87,-1.85,-1.7,-1.1,-  
0.17,0.79,1.58,CYP2D6  
43,32,8,46,96,150,168,152,121,76,54,5.70966,0,0,0,0,0,2.85483,0,0,0,0,0,0,0,0,0,  
0,0,0,0,0,0,5.70966,0,0,0,0,0,2.85483,0,0,0,0,2005.27,759.677,156.18,2763.59,522  
5.03,7266.43,7408.48,6102.39,4375.2,2570.69,1581.49,0.213909,0.010308,0.005426,-  
0.023838,-0.081459,-0.043354,0.00949,0.028728,-0.009935,-  
0.009986,0.007664,2475.67,1740.08,430.079,2756.28,5699.99,8787.4,9703.17,8663.87  
,6851.91,4274.68,2984.9,0.213909,0.010308,0.005426,-0.023838,-0.081459,-  
0.043354,0.00949,0.028728,-0.009935,-  
0.009986,0.007664,26,0,0,0,0,0,0,0,0,0,0,0,0,0,0,0,0,0,0,0,0,0,0,0,0,0,0,0,0,0,  
0,0,0,1,5,69,14,15,27,11,0,9,10,4,20,14,25,9,12,22,20,0,9,25,23,24,19,20,20,13,2  
1,17,0,14,10,19,11,10,14,17,10,11,13,6,13,9,16,9,12,8,8,8,8,6,14,7,4,7,4,9,5,4,6  
,6,2,0,1,4,5,3,2,6,0,0,1,3,11,0,3,1,0,0,1,1,0,0,0,1,0,0,0,0,0,0,0,0,0,0,0,0,338.462,  
0.084132,17,20,4,0,0,0,4,43,1.56,46,0,0,0,0,11.2423,8.41582,4,9.50154,0.913566,0  
.942575,0,2,0,2,0,0,0,0,2,6.48,4,2,0,56.22,4,0,1207,528.018,1580.92,1654.7,10.  
88,4.28062,3.48444,6,4.10628,3.00726,6.48,27.905,2.83353,5.52847,8.41582,18.23,7  
1.82,17,20,0,4.9669,0.718658,6,1180,6.48,234.38,458,458,30,2,2,20,9.46,1,0,0,1.7  
5,28.52,-5.89,1.64,-5.88,-5.81,-5.41,-4.49,-3.09,-1.33,0.16,1.15,CYP2D6  
41,67,53,44,82,114,119,99,59,64,70,44.841,0,0,0,14.6102,0,32.7221,0,5.18763,0,5.  
32566,0.144975,0,0,-0.012672,-0.028584,0.012114,-

0.053342,0.00748,0.002516,0,0,396.936,18.2141,9.2505,390.861,538.38,499.198,397.  
277,202.365,100.113,19.417,23.9557,2138.57,2866.84,1903.33,2803.8,4787.33,5758.1  
3,5228.84,3961.6,3181.28,3430.05,3429.36,0.577747,-0.046393,-0.026658,-  
0.282304,0.006384,-0.184919,0.314268,-0.172457,0.051817,-  
0.057531,0.085875,2837.17,4173.04,3218,3138.7,5672.65,7713.57,8123.44,6887.36,44  
75.29,4529.49,4600.45,0.678902,-0.00856,-0.001807,-0.392496,0.216683,-  
0.218942,0.164106,-0.198398,0.174836,-0.069369,-  
0.020394,19,0,3,2,0,2,1,2,2,1,1,0,3,0,2,0,0,0,0,1,0,0,1,35,0,0,0,0,0,0,0,9,1  
4,30,13,17,13,10,0,12,5,13,7,23,19,6,13,10,18,1,17,13,13,14,10,9,16,12,12,10,9,1  
9,8,8,10,7,13,0,13,4,7,7,7,11,5,7,6,5,8,9,7,12,7,7,7,3,6,9,6,10,11,3,2,0,4,8,7,8  
,5,5,1,3,8,6,7,12,5,4,0,4,8,3,3,5,2,2,2,4,4,3,2,1,2,1,0,3,359.558,0.152734,12,14  
,2,9,10,2,2,41,1.12,44,1,1,4,5,14.397,10.2203,4,12.8124,5.54712,0.986274,0,1,1,1  
,0,0,0,0,0,1,45.33,2,4,1,72.65,3,1,3288,538.668,3262.37,3519.54,14.5833,5.89388,  
5.95041,6,3.33879,2.94972,45.33,32.744,3.5878,6.71917,10.2203,18.09,81.5,17,19,3  
,6.72514,0.906847,5,1429,45.33,284.353,944,944,33,2,3,12.18,9.34,2,1,1,2.74,32.9  
4,-1.08,2.65,-1.08,-1.08,-1.07,-0.97,-0.48,0.41,1.38,2.24,CYP2D6  
52,102,94,55,98,133,142,147,129,113,103,76.4485,0,9.48456,0,0,8.36028,0,30.0522,  
5.47389,9.41925,9.02542,0.001739,0,0,0.000333,-0.000742,-0.000783,-  
0.000033,0.00026,0.000267,-  
0.000214,0.000044,526.099,56.3079,66.1106,569.249,826.745,880.146,677.311,495.26  
4,306.345,185.705,81.3645,3279.59,5196.62,4325.83,4225.78,6901.3,8479.95,8395.58  
,7956.2,7006.11,6139.45,5534.54,0.484628,-0.022593,-0.008355,-0.151366,-  
0.186385,0.121892,-0.040666,-  
0.044,0.064939,0.001252,0.001024,3433.55,6654.62,6118.06,3781.86,6595.31,8765.56  
,9164.7,9363.55,8317.53,7347.56,6743.65,0.47835,-0.024144,-0.006252,-0.151121,-  
0.185838,0.12137,-0.032711,-0.041075,0.05621,-  
0.000023,0.002099,24,0,3,5,4,5,2,5,1,1,5,1,5,4,4,1,4,4,3,1,4,1,3,45,2,2,2,1,2,4,  
1,0,0,1,9,49,12,25,24,12,0,7,10,6,6,33,3,4,9,16,20,0,13,37,17,15,11,12,20,14,15,  
33,13,26,16,14,9,12,16,2,11,12,9,9,18,15,21,15,16,21,15,9,14,13,5,23,19,13,14,13  
,9,10,11,7,9,0,10,17,15,9,11,17,15,9,16,10,13,12,10,10,13,7,9,7,3,8,7,3,5,3,10,1  
0,6,6,5,6,7,6,497.238,0.112125,15,18,2,12,12,2,0,52,1.3,55,2,2,7,8,18.6396,13.24  
15,4,14.9501,2.51274,0.959679,0,2,0,2,0,0,0,0,0,2,26.71,0,3,1,101.28,2,0,8675,20  
08.72,7145.96,8439.28,20.28,9.66686,8.09951,6,5.86807,3.17779,52.01,45.759,4.683  
96,7.62304,13.2415,23.09,127,20,22,5,8.42846,0.961177,6,3418,26.71,400.965,2000,  
2000,43,5,5,15.69,9.07,1,1,1,4.45,45.35,-1.55,4.41,-  
0.58,0.23,0.59,0.82,1.45,2.39,3.35,4.12,CYP2D6  
36,42,29,37,59,75,74,73,69,70,62,151.687,0,0,0,35.1874,90.2293,28.8995,70.8396,0  
,0,130.79,0.10614,-0.008181,0.010459,-0.021022,-0.029851,0.011736,-  
0.023012,0.00217,0.001491,0.015217,-  
0.010326,774.499,324.038,310.79,676.054,822.043,893.148,892.36,893.429,771.093,7  
71.19,724.771,2142.48,1456,951.076,2641.25,3996.49,4692.44,4433.09,4102.62,3755.  
62,3308.35,2414.27,0.831084,-0.198672,-0.241567,-0.494287,0.024908,0.24645,-  
0.460759,0.497508,-0.18952,-  
0.334831,0.543206,3034.88,3477.55,2507.03,3119.83,4841.72,6089.56,5928.25,5841,5  
622.22,5528.46,4949.99,1.05984,-0.225059,-0.239294,-0.63262,0.143023,0.22216,-  
0.671967,0.692258,-0.238334,-  
0.347413,0.569951,11,1,0,0,0,0,0,0,1,0,0,0,4,0,0,0,0,0,0,0,0,0,0,0,20,0,0,0,0,0,  
0,0,0,2,16,16,4,13,15,8,0,2,8,3,2,22,7,5,13,7,12,2,5,7,10,10,13,7,14,14,10,12,16  
,11,9,5,12,8,13,10,4,9,11,1,6,6,10,5,10,10,5,11,5,8,3,12,7,5,6,8,10,1,4,3,6,0,6,  
8,9,2,7,4,2,2,3,3,4,4,5,1,0,2,2,0,4,1,1,0,3,2,0,1,0,1,2,2,1,0,414.552,0.056981,1  
1,12,0,12,12,2,0,36,1.87,37,2,2,11,12,16.8196,10.9692,2,11.5181,1.04017,0.842455  
,1,0,1,0,0,0,0,0,0,75.63,0,5,2,78.1,0,0,4853,1684.21,3126.05,4138.21,19.3264,9  
.47461,8.59375,6,7.37042,2.64034,75.63,35.301,3.55422,6.76935,10.9692,16.34,86.3  
2,12,12,7,6.98835,0.701513,6,1742,75.63,354.184,1278,1278,32,6,8,3.44,-  
2.18,7,2,2,1.36,33.67,0.5,-0.14,-0.02,-0.13,-0.14,-0.14,-0.14,-0.14,-0.14,-  
0.14,CYP2C9

56,143,110,58,99,136,148,152,169,173,165,89.0291,24.7163,16.1566,0,16.9276,0,37.  
9562,9.88762,27.374,24.3805,0,0.09747,-0.019889,-0.001822,-0.004845,-  
0.036317,0.00183,-0.007436,-  
0.006676,0.000838,0.006379,0.01273,707.752,352.105,484.751,672.691,858.302,825.1  
83,814.196,742.441,723.577,493.744,396.663,3552.21,5477.72,3903.61,4613.66,7553.  
31,9332.08,10022.5,10026.1,9581.09,8551.02,7096.26,0.964515,0.302465,-0.162885,-  
0.54197,0.196644,-0.335374,0.469168,-0.424866,0.121904,0.114152,-  
0.281397,4009.68,9700.18,7887.54,4258.43,7083.75,9570.67,10323.7,10559,11385.6,1  
1540.8,10999.2,1.02151,0.218518,-0.157083,-0.605799,0.277713,-  
0.402734,0.529993,-0.526582,0.283498,0.006733,-  
0.233172,23,3,8,0,4,6,5,3,2,5,6,1,7,4,3,5,2,1,2,2,4,1,2,37,4,1,2,4,1,0,1,1,2,8,1  
1,39,15,29,21,6,0,9,16,9,13,30,9,15,18,23,17,1,11,16,18,18,16,28,28,20,18,16,17,  
23,21,19,18,21,22,20,20,18,19,7,31,17,20,20,22,27,28,14,24,15,7,16,14,15,19,19,1  
2,12,17,15,11,0,9,18,6,19,7,17,9,21,12,14,8,10,8,9,11,17,3,11,11,10,6,0,5,7,7,5,  
7,2,2,7,7,9,534.581,0.105223,15,16,0,15,16,3,2,56,1.7,58,2,2,15,16,21.8361,14.27  
38,3,15.9347,2.76957,0.946484,1,0,1,0,0,0,0,0,0,82.69,0,5,3,119.31,1,1,10358,2  
120.54,6570.17,8273.91,24.6387,11.2277,9.58262,6,4.90278,3.6982,82.69,47.059,4.5  
4036,8.2177,14.2738,25.11,114.86,15,16,8,8.57826,0.939074,5,3167,82.69,411.466,2  
476,2476,47,5,6,4.56,-  
10,2,3,3,4.46,46.03,2.44,0.78,1.52,0.94,0.8,0.78,0.78,0.78,0.78,0.78,CYP2C9  
33,38,20,35,57,69,76,69,61,47,46,355.506,8.88281,0,152.179,95.4607,164.966,351.6  
25,216.584,28.9852,64.2684,0,0.47418,0.008189,0.002699,-0.224371,-  
0.03302,0.054415,-0.00916,-0.010352,-0.105634,0.129635,-  
0.048843,926.628,322.09,131.664,964.375,1254.15,1322.21,1351.44,1102.19,833.884,  
780.808,568.767,2464.45,1788.13,885.561,3101.6,4889.04,5448.19,5329.33,4310.2,35  
57.8,2911.11,2502.7,0.789174,0.009545,0.005827,-0.496717,0.185731,-0.006784,-  
0.318529,0.371947,-0.132856,0.039823,-  
0.051941,3111.53,2993.38,1505.41,3290.18,5362,6580.76,7471.43,6587.63,5326.37,41  
62.52,3767.55,1.77939,0.011477,-0.032248,-1.10388,0.52009,-0.032862,-  
0.918198,1.04019,-0.614995,0.319801,-  
0.08086,8,4,2,0,1,2,2,1,0,0,2,0,6,0,0,1,0,2,0,0,2,0,0,9,0,1,0,0,0,1,0,0,0,2,14,1  
9,6,7,10,5,0,7,5,5,5,12,4,6,8,9,10,1,6,8,10,9,5,9,7,10,9,11,12,9,8,7,4,5,5,6,4,7  
,8,7,8,5,7,4,14,6,5,5,3,7,0,2,4,10,2,5,3,0,1,3,4,2,6,3,3,2,3,6,4,3,4,3,8,1,2,5,3  
,1,1,3,1,2,1,0,1,0,3,1,1,3,1,2,0,3,374.551,0.154495,12,14,1,11,11,2,0,33,1.67,35  
,0,0,8,9,16.7757,10.8194,3,14.1032,1.93271,0.98554,1,0,0,0,0,0,0,0,0,99.6,0,7,  
2,84.69,3,2,3723,876.751,5174.33,5876.36,17.8112,6.71884,5.23498,6,3.66167,2.960  
67,136.22,35.404,4.0049,7.37809,10.8194,15.07,87.9,15,16,2,7.94355,0.911493,5,16  
97,99.6,371.821,1115,1115,41,8,11,0.89,4.45,8,2,2,-0.72,33.47,-2.07,-3.62,-  
1.87,-1.26,-0.72,-0.96,-1.79,-2.72,-3.39,-3.59,CYP2C9  
33,32,8,34,55,68,78,81,61,57,54,54.7953,0,0,0,15.4558,0,37.7645,0,0,0,0,0.084095  
,0,0,-0.01698,-0.007958,-0.003595,-0.010734,-0.019415,0.016958,-  
0.005752,0.005429,540.694,0,0,549.75,707.722,688.272,597.229,541.517,470.935,322  
.617,107.308,1793.55,752.609,137.551,2245.45,3448.19,4084.09,4043.44,3614.67,287  
1.19,2404.59,1708.85,0.500651,-0.063444,0.041228,-0.323416,0.120058,-  
0.110188,0.208064,-0.245047,0.082204,0.051302,-  
0.011086,2376.71,2135.02,477.124,2510.12,3960.99,4891.59,5498.77,5566.65,4262.92  
,4013.05,3733.47,0.623191,-0.097064,0.041228,-0.42859,0.289107,-  
0.285636,0.276811,-  
0.298063,0.148515,0.017296,0.024799,13,2,0,0,0,0,0,0,0,0,0,0,2,0,0,0,0,0,0,0,0  
,0,20,0,0,0,0,0,0,0,0,0,1,8,25,8,8,12,6,0,1,6,3,8,21,7,5,7,11,12,1,7,2,8,18,1,11  
,10,12,14,11,14,9,12,6,7,12,6,7,6,8,14,2,2,9,7,5,4,7,4,4,4,7,2,6,8,3,6,4,3,6,2,3  
,2,0,1,2,5,1,6,0,1,0,2,3,6,2,5,1,0,0,2,0,2,0,1,1,0,1,1,0,0,1,0,0,0,0,327.082,0.0  
81282,6,7,0,12,12,2,0,33,1.83,34,2,2,6,7,13.121,8.59222,2,10.4572,2.26816,0.9362  
85,1,0,1,0,0,0,0,0,0,49.33,0,3,2,56.36,0,0,1799,633.439,1803.43,1953.17,14.41,  
6.43787,5.26749,6,4.47907,3.07155,49.33,28.887,3.01616,5.72195,8.59222,14.89,71.  
88,12,12,3,5.48048,0.827551,6,930,49.33,241.285,602,602,27,3,4,3.89,-  
1.68,3,2,2,3.85,26.92,3.58,0.72,2.82,1.88,1.09,0.77,0.72,0.72,0.72,0.72,CYP2C9

[illegible]

33,38,20,35,57,69,76,69,61,47,46,322.434,0,0,152.379,62.6219,161.152,272.56,130.  
948,28.9918,19.2221,0,0.472412,0.013404,0.000518,-0.224425,-0.023812,0.048566,-  
0.019997,-0.000867,-0.109092,0.132267,-  
0.052767,891.266,244.439,59.1924,931.657,1217.87,1259.69,1235.8,913.742,798.318,  
703.897,532.554,2301.57,1655.41,781.929,2903.9,4583.1,5131.65,5008.41,4041.18,33  
48.04,2741.55,2362.58,0.771814,-0.045159,-0.003586,-0.473067,0.12013,-0.005284,-  
0.128433,0.14992,0.009313,-  
0.06216,0.03427,3013.97,2885.11,1381.55,3212.15,5245.38,6437.52,7298.9,6330.04,5  
157.38,3972.68,3670.59,1.76155,-0.076643,-0.024568,-1.08003,0.46402,-0.111644,-  
0.613988,0.775227,-  
0.474723,0.217843,0.03045,9,4,2,0,1,2,2,0,1,0,2,0,6,1,1,0,0,3,0,0,0,0,1,9,0,0,0,  
0,0,1,0,0,0,3,14,19,7,8,9,5,0,7,4,4,5,13,4,6,8,10,10,1,6,7,10,9,4,9,7,10,9,11,12  
,9,9,8,5,6,5,7,3,7,7,7,6,7,4,14,5,6,4,1,7,0,2,4,11,3,5,4,0,1,2,5,2,7,3,2,2,3,5  
,4,3,4,3,7,1,1,4,3,1,1,4,1,3,1,0,1,0,3,1,1,2,1,2,1,2,353.149,0.131913,11,13,1,11  
,11,2,0,33,1.73,35,0,0,7,8,15.9054,10.4256,3,13.4522,2.46565,0.973206,1,0,0,0,0,  
0,0,0,0,0,99.6,0,7,2,79.26,3,2,3209,852.833,3709.01,4392.35,16.8438,6.48148,4.99  
671,6,3.6432,2.93254,136.22,33.476,3.64285,7.37916,10.4256,15.07,83.93,15,16,2,7  
.32106,0.823003,5,1513,99.6,337.376,988,988,39,7,10,1.32,4.45,8,2,2,-  
1.11,31.41,-2.52,-4.06,-2.32,-1.69,-1.11,-1.25,-2.03,-2.97,-3.73,-4.02,CYP2C9  
39,54,42,40,65,69,87,97,89,92,61,88.5554,32.5226,16.298,0,19.4131,37.2704,38.234  
6,0,0,58.2549,29.1932,0.1253,0.007366,0.002807,-0.071301,0.037647,-0.007995,-  
0.027394,0.017914,-0.003995,-0.01267,-  
0.005029,590.073,113.034,24.8353,586.521,768.047,736.331,500.692,463.854,563.897  
,534.462,283.272,1659.25,1429.68,901.072,2059.82,3166.32,3673.32,3905.76,3714.76  
,3151.94,2662.94,1845.86,0.937963,-0.061081,-0.008882,-0.535054,0.052749,-  
0.003736,0.356001,-0.398072,-0.384189,0.668302,-  
0.144641,2917.88,3997.54,3006.37,3186.98,5079.24,5513.63,6540.83,7080.46,6367.32  
,6315.14,4487.88,1.10824,-0.206981,-0.031401,-0.780833,0.512933,-  
0.365893,0.372098,-0.212218,-0.616101,0.789408,-  
0.073994,14,1,0,0,0,0,0,0,0,0,0,0,0,0,0,0,0,0,0,0,0,0,0,0,0,0,0,0,0,0,0,0,2  
3,8,11,21,9,2,0,3,3,2,14,18,6,5,15,8,9,0,14,6,13,13,5,22,8,23,18,10,17,25,1,9,11  
,5,20,14,15,7,1,3,13,11,10,11,10,10,7,10,14,9,2,9,10,7,16,11,9,4,7,6,1,2,4,7,12,  
3,7,5,4,6,0,3,11,2,4,9,1,2,1,2,1,0,1,0,1,0,1,0,0,1,1,0,0,0,386.673,0.072796,9,10  
,0,12,12,2,0,39,1.85,40,1,1,9,10,15.4054,10.0832,2,10.5306,2.8993,0.908766,0,0,2  
,0,0,0,0,0,0,0,105.51,0,7,4,70.18,1,1,3232,1114.64,2671.03,3216.71,17.3554,8.022  
22,5.95041,6,5.39374,5.03643,105.51,30.881,3.47273,6.77798,10.0832,17.37,81.51,1  
2,12,5,6.04904,0.553641,6,1466,105.51,290.318,946,946,33,7,7,20,7.16,6,2,4,1.05,  
29.8,-0.27,1.05,-0.26,-0.26,-0.26,-0.21,0.09,0.69,0.99,1.04,CYP2C9  
74,182,158,78,137,176,191,185,179,167,180,331.556,23.2817,74.8133,160.365,111.11  
1,42.645,21.66,48.4769,72.461,53.3744,21.9813,0.567455,0.019457,0.078786,-  
0.186368,-0.050533,-0.19015,0.098445,0.04747,0.057007,-0.059029,-  
0.02552,1252.05,1022.71,1022.46,1290.4,1666.73,1708.65,1707.23,1567.7,1425.97,12  
53.62,1012.49,4464.67,9462.02,8257.31,5710.21,9247.44,11076.5,11405.3,10777.4,10  
345.5,9959.67,9951.98,1.09431,-0.191026,0.135978,-0.717911,0.411043,-0.28742,-  
0.082558,0.271266,-0.253704,0.216287,-  
0.036447,5668.13,13372.2,11479.1,6074.46,10417.1,13299.6,14736.6,14428.4,13610.4  
,12689.1,13039.2,2.14089,-0.339337,0.301697,-1.36727,0.846369,-  
0.953458,0.361954,0.257957,-0.368747,0.328494,-  
0.056248,31,1,24,19,20,24,17,17,23,19,16,23,13,18,14,20,15,12,8,23,25,12,16,47,9  
,16,12,12,11,13,15,10,18,11,21,42,17,29,21,18,0,9,18,9,15,44,7,11,25,17,29,2,27,  
14,19,25,20,18,21,22,31,27,24,29,22,16,18,20,23,19,24,19,32,9,39,12,18,24,19,29,  
17,24,18,33,8,26,32,22,23,24,23,19,25,24,18,1,24,22,26,23,21,19,30,23,25,29,15,2  
3,29,19,22,23,25,26,23,21,24,1,26,25,24,16,20,24,20,19,24,17,703.992,0.077703,20  
,23,1,21,22,4,0,74,1.05,78,4,3,15,18,29.1477,19.6402,5,17.1802,3.36933,0.898942,  
1,0,1,0,0,0,0,0,1,0,115.73,0,9,2,181.86,1,1,39116,5691.73,12992.8,17033.2,32.395  
1,14.4,13.2599,6,10.9441,3.1302,124.11,63.652,5.56978,9.81496,19.6402,32.83,158.

58,26,27,8,9.61104,0.750406,5,9240,115.73,575.676,6548,6548,66,7,11,4.29,-  
1.08,6,2,2,6.19,61.71,6.19,5.05,6.19,6.17,6.03,5.54,5.14,5.06,5.05,5.05,CYP2C9
